# Supplementary material
Source: PubMed Central journal article supplement (PMC6341278)
Supplement: mmc2.pdf [file mmc2.pdf]

# Conformations of an RNA Helix-Junction-Helix Construct Revealed by SAXS Refinement of MD Simulations

Yen-Lin Chen,<sup>1</sup> Tongsik Lee,<sup>2</sup> Ron Elber,<sup>2,3</sup> and Lois Pollack<sup>1,\*</sup>

<sup>1</sup>School of Applied and Engineering Physics, Cornell University, Ithaca, New York; <sup>2</sup>Department of Chemistry and Biochemistry and <sup>3</sup>Institute of Computational Sciences and Engineering, University of Texas at Austin, Austin, Texas

**ABSTRACT** RNA is involved in a broad range of biological processes that extend far beyond translation. Many of RNA's recently discovered functions rely on folding to a specific conformation or transitioning between conformations. The RNA structure contains rigid, short basepaired regions connected by more flexible linkers. Studies of model constructs such as small helix-junction-helix (HJH) motifs are useful in understanding how these elements work together to determine RNA conformation. Here, we reveal the full ensemble of solution structures assumed by a model RNA HJH. We apply small-angle x-ray scattering and an ensemble optimization method to selectively refine models generated by all-atom molecular dynamics simulations. The expectation of a broad distribution of helix orientations, at and above physiological ionic strength, is not met. Instead, this analysis shows that the HJH structures are dominated by two distinct conformations at moderate to high ionic strength. Atomic structures, selected from the molecular dynamics simulations, reveal strong base-base interactions in the junction that critically constrain the conformational space available to the HJH molecule and lead to a surprising re-extension at high salt. These results are corroborated by comparison with previous single-molecule fluorescence resonance energy transfer experiments on the same constructs.

## INTRODUCTION

RNAs perform complex biological functions in cells and viruses ranging from gene expression (1–4) through enzymatic activities (5–8). This wide array of functions is partially enabled by RNA's intrinsic flexibility, which provides ready access to different conformations (9–11). As a direct result of structural studies that elucidate RNA conformations (12–15), there has been increasing interest in pharmaceutical applications for functional RNA molecules (16–19). Because of RNA's hierarchically organized structures, identifying the roles of individual RNA structural elements has been an effective lens for visualizing RNA folding pathways (20). In this spirit, we have been exploring the salt dependent conformations of a simple RNA system containing two short duplexes joined by a single strand of RNA: an RNA helix-junction-helix (HJH) construct.

Naively, one might expect a continuous change in the conformation of this model system as a function of increasing [KCl] because both the screening length of the

ionic cloud around the helices and the linker stiffness decrease with added salt (21). Surprisingly, previous studies of the HJH system by single-molecule fluorescence resonance energy transfer (smFRET) showed a nonmonotonic energy transfer ( $E_{FRET}$ ) with increasing KCl concentrations (22), suggesting that the dyes attached to the two helices do not report a continuous molecular collapse as the salt concentration increases (23). From FRET studies carried out with different constructs, we arrived at the following qualitative explanation of the measured salt dependence: repulsion between helices determines conformations at low salt, junction sequence determines conformation at high salt, and these effects compete at moderate (close to physiological) salt.

A quantitative interpretation of FRET data is challenging if multiple, interconverting conformations of a flexible system simultaneously contribute to the signal. The energy transfer efficiency,  $E_{FRET}$ , represents a temporal average over all the conformations visited during a measurement. Multiple states in an ensemble cannot be distinguished if the duration of one FRET event (10–100  $\mu$ s) exceeds the typical dwell time of a state. Thus, additional measurements are required to assess the makeup of the structural ensemble

Submitted May 2, 2018, and accepted for publication November 12, 2018.

\*Correspondence: [lp26@cornell.edu](mailto:lp26@cornell.edu)

Editor: David Lilley.

<https://doi.org/10.1016/j.bpj.2018.11.020>

© 2018 Biophysical Society.

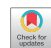

and, for the HJH construct, to explain the measured nonmonotonic trends.

The global size, shape, and composition of this HJH construct make it a suitable system to study by small angle x-ray scattering (SAXS) and all-atom molecular dynamics (MD) simulations. SAXS reports global structural properties such as radius of gyration ( $R_g$ ), pair-distance distribution function ( $P(r)$ ), and maximal distance of atom pairs ( $D_{max}$ ). The SAXS profile is largely determined by the relative position and orientation of the more electron-dense, rigid RNA helices (24,25), which dominate the measured scattering signal. In addition, this simple HJH construct is also an ideal target for MD simulations. However, because there are numerous uncertainties in simulations, including force fields and sampling convergence, verification of MD results and enhancements of their accuracy as needed are essential. This is especially critical for RNA, for which force-field inaccuracies are well documented (26–28).

The accurate coupling of experiments and simulations for ensemble determination is a major goal for structural biology studies (29). Empirical energies are used in conjunction with simulations to find conformations that satisfy experimental, chemical, and geometrical constraints. In typical applications, terms that penalize deviations from experimental values are added to the simulation force fields, and simulations are conducted to find minimal energy or free-energy structures (30). MD simulations are especially needed when the experimental data are sparse and not complete enough to determine a tight set of conformations, but even sparse data can still be used to bias the MD simulations toward more consistent shapes. Of course, a goal in the MD field is to create increasingly reliable simulations and to make progress in force-field parametrization and enhanced sampling techniques. Ideally, simulations will provide useful information on the system geometry and behavior even without the experimental input.

An intermediate mode of coupling between experiment and simulation is to conduct simulations without an experimental bias but to use experimental data to select a subset of the MD structures that is consistent with the empirical observations. A disadvantage of this procedure is that significant flaws in MD setup will be hard to correct, i.e., no or a very few structures will be obtained that satisfy the experimental observables. This result may significantly reduce the statistics and the reliability of the proposed approach. The advantage of using MD without bias is that the same simulations can be used for a variety of tasks, can help to interpret more than one experiment, and can potentially predict other observables that can be probed in future experiments. We use this type of approach in this manuscript, employing an ensemble optimization method (EOM) (31) to couple MD and SAXS data. To assess the feasibility of the selected models, we compute a FRET signal from the selected structures and compare with additional measurements. EOM was introduced and

recently used to investigate and interpret the folding dynamics of a small RNA (32).

We use unbiased MD simulations to generate structures for further experimental refinement by requiring agreement with measured SAXS data. In this way, we identify the conformational ensembles in which three-dimensional helix placement best recapitulates our measurements. The known orientation of these helices provides strong geometrical constraints on the junction conformations, which in turn are further constrained by interactions between its bases. The combination of SAXS and MD allows the junction conformations to be inferred.

Our results reveal a surprising salt dependence of the HJH: a bimodal, as opposed to continuous, distribution of structures is found, implying similar complexity to other RNA junction systems (33,34). An extended state reemerges at high salt as a result of strong stacking interactions between uracil bases. Such an extension is not immediately evident from the FRET results, but with the deeper understanding of the smFRET experiment described here, including careful consideration of the ensemble nature of HJH, the SAXS and FRET results are consistent, validating our refinement scheme.

## MATERIALS AND METHODS

### RNA HJH construct

The RNA HJH contains two 12 based-paired RNA duplexes linked by a short chain of rU<sub>5</sub>, shown in Fig. 1. The molecule is constructed by pairing a 29-nucleotide backbone with two complementary 12-nucleotide oligonucleotides at the ends. The long backbone has the same mixed sequence as in (22), CCC UAU ACU CCC UUU UUC CUC CUA AUC GC.

### Sample preparation

RNA molecules were purchased desalted, protected, and high-performance-liquid-chromatography-purified from Dharmacon (Lafayette, CO). 400  $\mu$ L of deprotection buffer was added to three tubes of single-stranded RNA molecules individually. The mixtures were incubated at 60°C for 30 min. All three strands were reconstituted in the annealing buffer, 10 mM potassium 3-(N-morpholino) propanesulfonic acid buffer containing 100 mM KCl and 20  $\mu$ M EDTA at pH 7 using Amicon 3 kDa 0.5 mL Ultra Centrifugal Filters (EMD Millipore, Billerica, MA). 130.6 nmole of three single-stranded RNA molecules was mixed together in 200  $\mu$ L annealing buffer, annealed at 92°C for 2.5 min, slowly cooled in air for 15 min to ~35°C, and further cooled in a water bath for another 15 min to room temperature. The solution was then concentrated, and HJH construct molecules were separated from unannealed single-stranded RNA molecules by an Amicon 10 kDa 0.5 mL Ultra Centrifugal Filter. The concentrated HJH sample was divided into five aliquots for buffer exchange in 30, 50, 100, 200, and 500 mM KCl with 10 mM potassium 3-(N-morpholino) propanesulfonic acid and 20  $\mu$ M EDTA. Different volumes of buffer were added to bring the volume to 30  $\mu$ L for SAXS measurements.

### SAXS

The SAXS measurements were conducted at the Cornell High Energy Synchrotron Source (CHESS) beamline G1 using an EigerX 1M detector

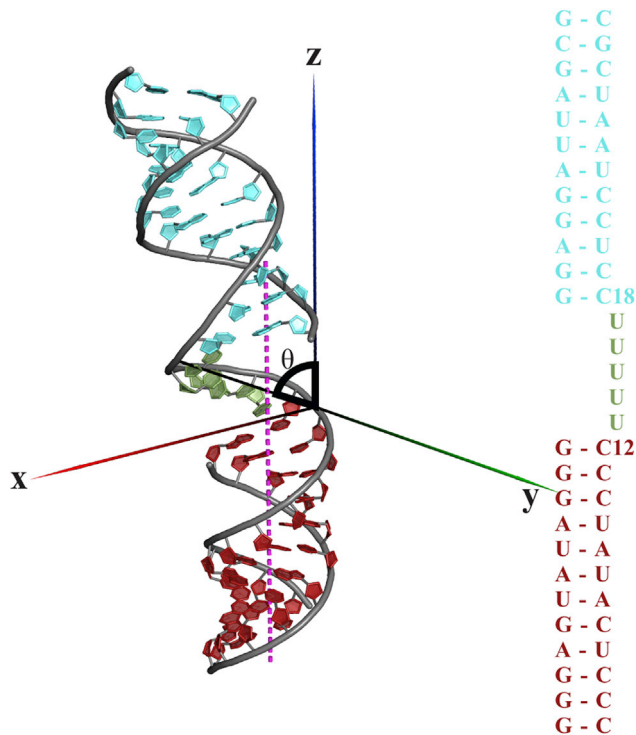

FIGURE 1 HJH RNA construct and its sequence. The HJH molecule comprises three basic RNA elements: two 12-bp-long duplexes shown in dark and light colors, linked by an rU5 junction. The junction vector is defined by a bending angle  $\theta$  between the  $z$  axis and the line joining the phosphorus atoms of C12 and C18. To see this figure in color, go online.

(Dectris AG, Switzerland) with a sample-to-detector distance of  $\sim 1.7$  m. The SAXS curves were integrated and averaged from three sets of 20 images with 10-s exposure. To achieve the optimal sample concentration without interparticle interference, 40, 80, 120, 160, and 200  $\mu\text{M}$  samples were measured under all conditions. No evidence of interparticle interference was found. We selected a final RNA concentration of 80  $\mu\text{M}$  with reasonable sample consumption and good SAXS signal/noise ratio without systematic interparticle interference or aggregation (see Supporting Materials and Methods; Fig. S4). The momentum transfer  $q$  is defined as  $q = (4\pi/\lambda) \times \sin(2\theta/2)$ , where  $\lambda$  is the x-ray wavelength and  $2\theta$  is the scattering angle. Data were collected over a  $q$  range from 0.011 to 0.295  $\text{\AA}^{-1}$ . The SAXS curves were normalized by the number of photons measured at the beamstop to account for varying beam intensity. Buffer-subtracted curves were scaled to account for any slight variations in sample concentration. We used home-written MATLAB (The MathWorks, Natick, MA) scripts for the data analysis.

## EOM for SAXS

In solution, flexible molecules visit a large number of conformations. A single SAXS profile reports the time-averaged scattering curve from the different instantaneous molecular states within the measurement period. The ensemble optimization method (31,35) fits a SAXS profile using a sum of individual states in an ensemble:

$$\frac{1}{N} \sum_{i=1}^N I_i(q) = I_{\text{exp}}(q), \quad (1)$$

where  $I_i(q)$  is the theoretical scattering profile of the  $i^{\text{th}}$  state and  $N$  is the total number of states in an ensemble or the size of an ensemble. We built multiple structural pools from MD simulations that contain plausible structures and used CRY SOL (36) to compute the theoretical scattering curves for each conformation. We did not populate the structures with ions because the increase in scattering due to the presence of these low  $Z$  partners is smaller than the error in the EOM fits (see Supporting Materials and Methods; Fig. S5). A genetic algorithm can be applied to choose different conformations from the large pool, forming an ensemble that best fits the experimental SAXS profile by minimizing

$$\chi^2 = \frac{1}{K-1} \sum_{j=1}^K \left( \frac{\mu I(q_j) - I_{\text{exp}}(q_j)}{\sigma(q_j)} \right)^2, \quad (2)$$

where  $I$  and  $I_{\text{exp}}$  are the ensemble and experimental SAXS profiles with  $K$  data points at certain  $q_j$ , respectively, whereas  $\sigma$  and  $\mu$  are the experimental error and scaling constant. The genetic algorithm is implemented using the program GAJOE 2.1 (35). We used a maximal ensemble size of  $N = 20$ , different numbers of generations, and genetic algorithm cycles based on the size of pools. Constant subtraction was enabled because of different baselines of the experimental and theoretical SAXS profiles. The models chosen by GAJOE from all genetic algorithm cycles comprise the “all cycle” ensemble, and many of them are highly degenerate. The degeneracy and large ensemble size result in the difficulty of identifying the representative models. One way to significantly reduce the ensemble size is to extract models from the best genetic algorithm cycle with the smallest  $\chi^2$ . It turns out that the models from the “best cycle” consistently reproduce the properties of the ensemble from “all cycles.” In the rest of the study, the term “ensemble” refers to the ensemble from “all cycles” if not otherwise stated. It is known that ensemble size might introduce uncertainties in the results (37), but in our case and implementation, varying ensemble sizes only yield more degenerate conformations or more selections of the same conformations. Our results hold for different ensemble sizes tested. Clustering analysis (see Supporting Materials and Methods; Figs. S1 and S2) was done to combine similar and degenerate models.

A significant challenge associated with this type of approach involves the potential for overfitting the data. Although we exercise care to use the smallest possible ensemble size that minimizes  $\chi^2$ , we do not expect to retrieve identical results for each cycle of fitting. Instead, we seek (and find) plausible solutions consisting of clusters of similar structures that equally well recapitulate our experimental measurements. As an essential check on our findings, we validate the results of the EOM selection against an independent experimental measurement, in this case FRET.

## MD simulations details

We used the Nucleic Acid Builder web server (38) to create the structure of the HJH construct in the canonical A-form, in which the 5' and 3' ends of the junction were respectively linked to the 3' end of the first helix (H1) and the 5' end of the second helix (H2). Initially, the complex was aligned along the positive  $z$ -direction. The diameter and length of H1 and H2 were  $\sim 21$  and 41  $\text{\AA}$ , respectively, in their idealized A-form. The HJH construct was solvated in a rectangular periodic box measuring  $85 \times 85 \times 145 \text{\AA}^3$  (3) of an aqueous solution containing monovalent  $\text{K}^+$  ions. The dimensions of the box were determined such that the ion cloud of the HJH construct does not overlap with their periodic images for any global conformations. The box contains  $\sim 103,000$  atoms.

Simulations were performed at eight different KCl concentrations: 30, 50, 75, 100, 200, 300, 500, and 900 mM. These target values were selected in accordance with those examined in the experiments, except for 30 mM. Below this concentration, the number of ions is too scarce for the given system size to provide reasonable statistics. An additional 50  $\text{K}^+$  ions were added to the system to ensure the overall charge neutrality, which is a

prerequisite for our electrostatic potential calculations.  $K^+$  and  $Cl^-$  ions were initially distributed in the solvent, randomly replacing water molecules.

Force fields were adopted from previous MD studies on isolated RNA duplexes (39,40). The bonding and nonbonding terms were obtained by AMBER f99 (41) and OPLSAA (42), respectively. Water molecules were modeled with the TIP3P (transferable intermolecular potential with three points) force field (43) with appropriate parameters for ion-water interactions (44) and ion-nucleic acid interactions (45).

We conducted MD simulations using the molecular package MOIL (46,47). The periodic lengths were slightly contracted to reproduce the experimental water density at every corner of the simulation box. To reduce the necessary size of the system, H1 was fixed to its initial position to maintain the idealized A-form by means of the harmonic constraint with a force constant of  $10 \text{ kcal mol}^{-1} \text{ \AA}^{-2}$  throughout the simulation. However, both H2 and the junction were mobile without any conformational constraint. The long-range electrostatic forces were computed using the smooth particle mesh Ewald method (48) with  $64 \times 64 \times 128$  grid points. The cutoff radius for van der Waals interactions and for the real-space component of the electrostatic forces was set to  $10.0 \text{ \AA}$ . The water molecules are constrained to be rigid with a symmetric matrix implementation of the SHAKE algorithm (49,50). At each ionic concentration, a production simulation of 640–670 ns was run at constant volume and temperature (300 K) using velocity rescaling. Configurations were saved every 1 ps for analysis.

## Structural pool construction by MD

The construction of structural pools is crucial in the sense that the pools should consist of realistic structures and cover as many states as possible in the conformational space. We use the structures from MD simulations to populate the pool as follows. Initially, pools were constructed from simulations at different [KCl], ranging from 30 to 900 mM. Each of these pools contains 2000–3000 structures. For a second pool, we obtained the structures from longer simulations carried out for 600 ns after equilibration. A third and larger pool of 22,540 structures was constructed by combining all the smaller pools from the 200 ns simulations. This step prevents potential bias or inaccuracy from the salt dependence of MD simulations. The size of each pool is shown in Table 1. For a direct comparison of MD results and experimental data, we calculate the time-averaged theoretical SAXS curve by averaging all the computed scattering profiles of all the models for each condition. We also computed the  $\chi^2$  value using Eq. 2 to determine the quality of fit.

## Probabilistic ensemble and smFRET

To correlate the experimental smFRET measurements with results of the SAXS-derived ensembles, we need to simulate the  $E_{FRET}$  of the ensemble. We take the following experimental variables into account. First, the experimental  $E_{FRET}$  was measured using freely diffusing molecules on a confocal microscope with focal volume of  $\sim 10^{-15} \text{ L}$ . The average residence time of a single HJH molecule in this volume is on the order of  $\mu\text{s}$ , whereas the structural fluctuations of the two RNA duplexes occur on timescales between tens and hundreds of nanoseconds. Therefore, the HJH molecule

samples many different conformations while diffusing through the focus. Second, because of the probabilistic nature of fluorescent energy transfer described by binomial distribution (51), the efficiency,  $E_{FRET}$ , cannot simply be averaged across different conformations in an ensemble. We will show in the next paragraph that interchanging compact (high-FRET) and extended (low-FRET) states do not contribute equally to the measured FRET efficiency. Lastly, with this picture in mind, not every state in the ensemble is sampled because of a finite number of events in a measurement. A single FRET measurement may reflect contributions from tens of conformational states, and some conformations may not be sampled through thousands of FRET measurements. In contrast, dominant conformations would be visited more often.

For a highly flexible molecular system whose dwell time in a given state is shorter than the diffusion time through the focal volume, high-FRET states more significantly contribute to the measured number of acceptor photons than low-FRET states. The measured  $E_{FRET}$  value is therefore larger than a simple, equally weighted average. For example, consider a measurement  $M$  from a two-state system with equally populated low-FRET ( $l, E_{low} = 0.3$ ) and high-FRET ( $h, E_{high} = 0.7$ ) states. If we record  $E_{FRET,exp} = 16/30 \approx 0.533$  with 16 acceptor photons and 14 donor photons under the assumption of ideal dyes and measurement, the Bayes theorem suggests that this measurement is more likely to be generated by a high-FRET conformation diffusing through focal volume with the conditional probability

$$Pr(h|M) = \frac{Pr(M|h)Pr(h)}{Pr(M)} = 84.5\%. \quad (3)$$

With an  $E_{FRET}$  value that just slightly exceeds 0.5, this measurement reflects conformations that are strongly biased (more than five times more possible) toward the high-FRET state. Moreover, we can compute the expected value of  $E_{FRET}$  if this two-state system spends equal amounts of time in each state while passing through the focal volume. For a given number of donor photons, the high-FRET state, on average, will contribute more than twice the number of acceptor photons emitted by the low-FRET state. Therefore, measurements of such a rapidly interchanging system overestimate  $E_{FRET}$  and are biased toward high-FRET states: in a (rapidly exchanging) ensemble measurement containing both extended and compact states, the molecules appear more compact than they really are because a FRET event with sufficient acceptor photons more likely originates from high-FRET states.

Considering these characteristics of smFRET experiment and the highly flexible HJH system, we formulate the following to simulate  $E_{FRET}$  from a SAXS-derived structural ensemble. We start with a random FRET burst size based on the burst size distribution (BSD) for an exponential decay:

$$BSD(x) = \frac{1}{s} e^{-\frac{x-t}{s}}, \quad (4)$$

where  $x \in \mathbb{N}$  is the number of photons in a burst and  $x \geq t$ . Here,  $t = 30$  is the typical threshold of the FRET burst size and  $s = 3$  is the characteristic decay constant measured directly from experiments. During the time of a single FRET measurement, HJH visits  $N$  interconverting states in the focal volume, and each state contributes  $A_i$  acceptor photons, according to a binomial distribution,  $B(n, p)$  with  $(n, p) = (BS_i, E_{FRET,i})$ :

$$A_i \sim B(BS_i, E_{FRET,i}), \quad (5)$$

where  $A_i$  is the number of acceptor photons emitted by state  $i$ , whereas  $BS_i$  and  $E_{FRET,i}$  are the burst size and energy-transfer efficiency for state  $i$ , respectively. The value  $E_{FRET,i}$  is calculated using the average distance between two labeled bases,  $R_i$ , in (22) using  $R_0 = 52 \text{ \AA}$ .

**TABLE 1** Number of Models in Different Searching Pools

| [KCl] (mM) | All-Salt Pool | Subpool: 200 ns | Subpool: 600 ns |
|------------|---------------|-----------------|-----------------|
| 30         | 22,540        | 2970            | 12,857          |
| 50         |               | 2984            | 13,225          |
| 100        |               | 2980            | 13,014          |
| 200        |               | 2823            | 12,773          |
| 500        |               | 1944            | 12,930          |

$$E_{FRET, i} = \frac{1}{1 + \left(\frac{R_i}{R_0}\right)^6} \quad (6)$$

The probability of getting exactly  $A_i$  acceptor photons is

$$\begin{aligned} \Pr(A_i) &= \Pr(A_i; BS_i, E_{FRET, i}) \\ &= \binom{BS_i}{A_i} (E_{FRET, i})^{A_i} (1 - E_{FRET, i})^{BS_i - A_i}. \end{aligned} \quad (7)$$

Here, we assume that the transition time between different states of HJH is negligible and donor excitation rates are constant. The resultant  $E_{FRET}$  of this single FRET event can be calculated as follows:

$$E_{FRET} = \frac{\sum_{i=1}^N A_i}{\sum_{i=1}^N BS_i}. \quad (8)$$

It is interesting to note that the number of visited interconverting states,  $N$ , follows a similar exponential decay as  $BSD(x)$  because the more time a molecule spends in the focal volume, the larger the burst size and the number of visited states are. In our calculation, we use a total of 1500 FRET events, which is a typical number in a smFRET experiment with good statistics. The distribution of the calculated  $E_{FRET}$  is fitted by a normal distribution, whose center is then interpreted as the  $E_{FRET}$  of the ensemble.

## RESULTS

### Raw SAXS data

Conformational changes of the HJH in different [KCl] are detectable by SAXS. Fig. 2 *a* shows the raw SAXS data by reporting scattering intensity as a function of  $q$  (*top*); the Kratky plots of  $Iq^2$  vs.  $q$  (*middle*), which emphasize scattering at higher  $q$ ; and the pair distance distribution,  $P(r)$ ,

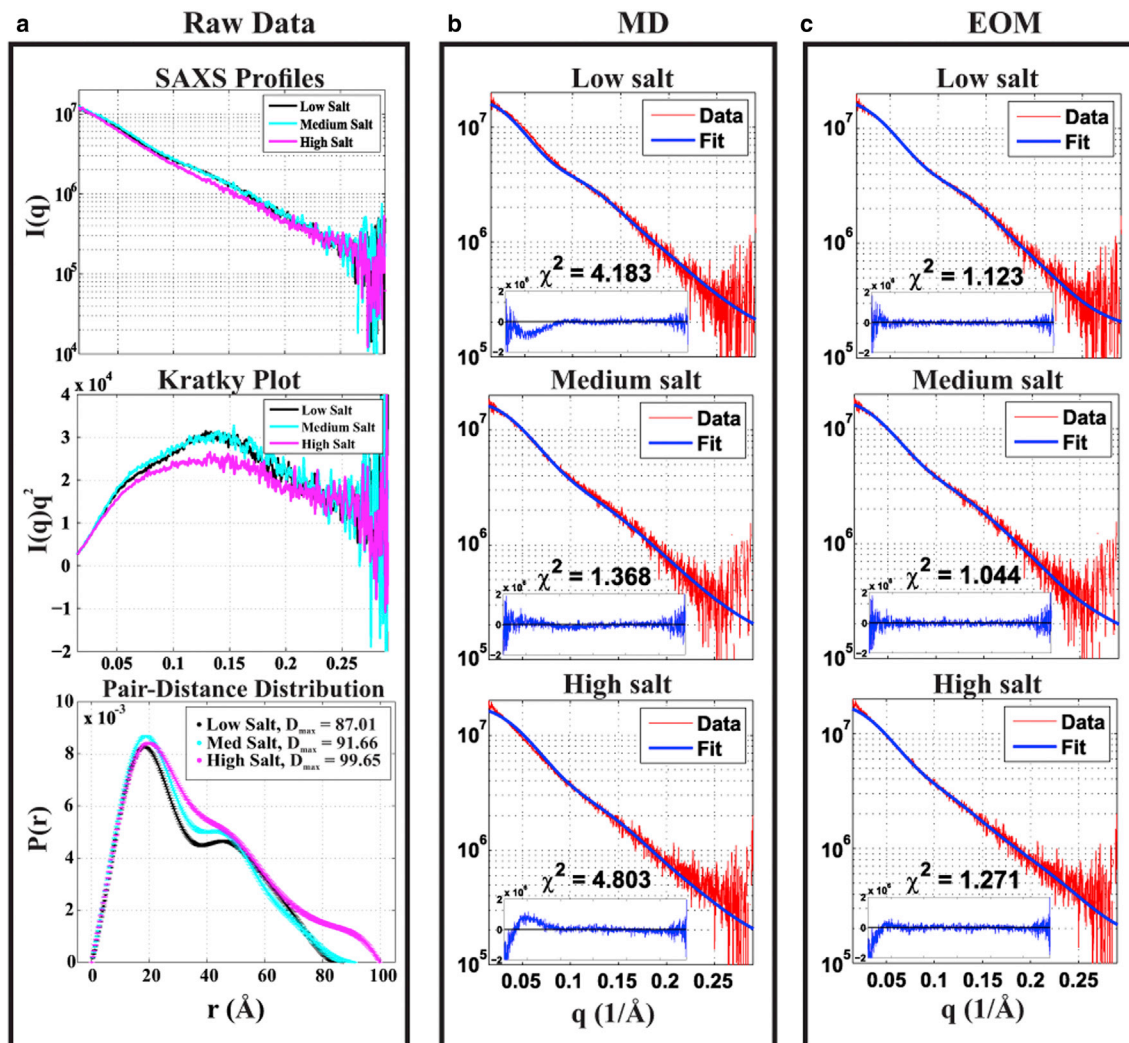

FIGURE 2 Comparison of raw SAXS data with predictions from the full (600-ns) MD pool and EOM refinements of that pool. (a) The raw SAXS profiles, the Kratky plot, and the pair distance distribution function. The Kratky plot of high salt suggests that HJH in high (500-mM) [KCl] is more extended than in low (30-mM) and medium (100-mM) [KCl]. The right two panels show the comparison with SAXS data of (b) MD and (c) EOM predictions, using residuals and  $\chi^2$  to evaluate the quality of the fits. The MD method fits the data best at medium salt and is improved, in all cases, by experimental refinement using EOM.

computed by the ATSAS data analysis package (52) (*bottom*).  $P(r)$  provides a real-space interpretation of scattering data. The SAXS data were acquired at [KCl] ranging from 30 to 500 mM. Three characteristic points are shown in the figure: low (30-mM), medium (100-mM), and high (500-mM) KCl. Scattering profiles for the HJH at low and medium salt are different, as viewed in the Kratky plots and Holtzer plots (Fig. S3); however, a small change in  $P(r)$  near 40 Å suggests conformational variations. More significant changes are observed at high [KCl]. Because more pronounced peaks in Kratky plots are associated with more compact molecular conformations, the diminution of the peak at 500-mM KCl indicates that the HJH molecule is extended relative to its low salt conformations. Such a counterintuitive result is further supported by the salt-dependent  $P(r)$  curves. At high salt, the maximal pair distance  $D_{max} = 99.65$  Å, as compared with 87.5 at lower salt. Thus, the raw SAXS data reveal unexpected HJH global properties, but they are challenging to interpret.

### Fitting SAXS data with full, 600-ns MD pool

To gain insight into the ensemble of molecular conformations present, we refer to MD models. As a first step, we compare each experimental SAXS profile with the MD prediction from the longer, 600-ns simulation at the corresponding [KCl]. The theoretical SAXS profiles of all the MD models were computed by CRY SOL (36) and subsequently averaged. Fig. 2 *b* directly compares the profiles computed from MD to the SAXS data. The  $\chi^2$  and fitting residuals are shown at the bottom of each plot. The logarithmic y axis highlights more subtle features of the curves. The MD models fit the SAXS data well at medium [KCl] with  $\chi^2$  of 1.368, with only a small mismatch in the mid- $q$  regime

( $q = 0.1\text{--}0.15$  Å<sup>-1</sup>). In contrast, at low and high salt, agreement with MD-computed profiles is good only in the middle of the measured  $q$ -range, resulting in large values of  $\chi^2$ . The disagreement in the higher- $q$  ( $q > 0.15$  Å<sup>-1</sup>) regime is significant in identifying the conformational ensemble because the separation range between the two helices occurs on the length scales of tens of Å, which contributes to the scattering in this  $q$  range.

### Fitting SAXS data with EOM refinement of 600-ns MD pool

Following recent studies showing the success of ensemble methods in describing highly flexible single-stranded nucleic acids (53) and DNA bulges (54), we further improved the fitting to the SAXS data by guiding a selection of a subset of the MD models using an EOM. The resulting curves,  $\chi^2$ , and fitting residuals are shown in Fig. 2 *c*. For low and high [KCl], the ensemble selection significantly improves the fit to the data. Most of the  $\chi^2$  contribution comes from the relatively large residuals at  $q < 0.05$  Å<sup>-1</sup> and  $q > 0.25$  Å<sup>-1</sup>. With the higher-quality EOM fits and smaller ensemble at each [KCl], we can visualize the conformations that populate the ensemble at salt concentration.

### Optimizing the MD pools for EOM

Encouraged by the improvements to the fits shown in Fig. 2, we explored the use of different structural pools as input to the EOM algorithm to ensure that all relevant conformations are represented. Fig. 3 presents these comparisons, in which each structure is parameterized by its radius of gyration,  $R_g$ . The top two rows show a comparison using the pools generated by the two different simulation lengths: 200 and 600 ns. The latter pool was used to generate the data shown in

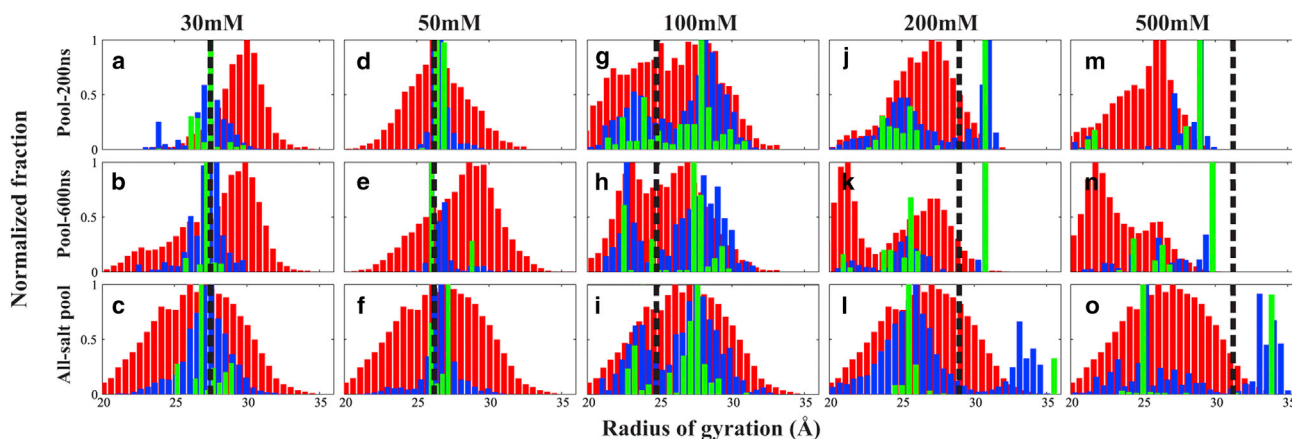

FIGURE 3 Distribution of radii of gyration ( $R_g$  values) of all structures at different [KCl] using Subpool-200 ns (*a,d,g,j,m*), Subpool-600 ns (*b,e,h,k,n*) and All-salt pool (*c,f,i,l,o*). The black dashed lines indicate the experimental  $R_g$  values of 27.5, 26.5, 24.7, 29.0, and 31.4 Å for 30–500 mM KCl concentrations. The gray histograms show the  $R_g$  distribution of all structures in each pool, under the quoted condition, whereas the darker and lighter histograms show the distributions from the “all-cycle” and “best-cycle” EOM analysis, respectively. Each distribution is normalized by the maximal number of counts. To see this figure in color, go online.

**Fig. 2.** The  $R_g$  distribution of the full pool (containing all structures from the MD simulation of a given length at a given condition) is shown in red, whereas the distribution of structures in the EOM-selected ensembles of “all cycles” and “best cycle” are shown in blue and green, respectively. The black dashed lines represent the experimental  $R_g$  values.

At low salt, the full MD pool for both simulations contains broad distributions of structures, centered at  $\sim 30$  Å. The EOM-selected ensembles are centered at 26.5 Å (Fig. 3, *a*, *b*, *d*, and *e*). Near physiological salt conditions, [KCl]  $\sim 100$  mM, the longer (600-ns) simulation predicts a bimodal  $R_g$  distribution. This trend is mirrored and enhanced in the selected ensembles despite a slight shift of the peak positions (Fig. 3, *g* and *h*). Thus, the MD prediction of two peaks is borne out by the selection algorithm. The MD simulations perform well (as assessed by the  $\chi^2$  metric) near physiological salt at which the force fields are extensively used (55,56). At [KCl] = 200 mM, the peaks shift further apart in the pool, and a very compact state emerges in the longer simulation, with  $R_g = 21$  Å. Interestingly, the EOM-selected ensemble also includes conformations with a larger  $R_g$  (Fig. 3, *j* and *k*). At high salt, [KCl] = 500 mM, the two peaks in the MD pool smear out, implying a broad distribution of structures from compact to extended. In contrast, the EOM procedure specifically selects the most extended models (Fig. 3, *m* and *n*). This selection is concerning because models with  $R_g > 30$  Å are absent from the corresponding MD pools. The algorithm therefore chooses the most extended models available. This discrepancy raises the question of potentially flawed ensembles if the pool fails to cover the required conformational spaces. To account for this possibility, we created a third, large pool, the “all-salt pool” that includes every model from all the 200-ns MD simulations. Results of EOM selection from this pool are shown in the bottom row of Fig. 3, *c*, *f*, *i*, *l*, and *o*.

Interesting trends are observed when the larger, all-salt pool is used. Although the same pool is used for all data sets, distinct conformational ensembles are selected at different [KCl]. In most cases, the overall structural features of the refined ensembles are consistent with those selected from the smaller pools at each value of [KCl]. There is one notable exception: structures with larger  $R_g$  in the ensembles at higher salt (Fig. 3 *o*). As discussed above, these structures are absent from the smaller MD simulation pools.

### HJH subtleties at different KCl concentrations

To ensure that all possible structures are represented, we focused the remainder of our analysis on comparison of experimental data with structures from the all-salt pool. From Fig. 3, *c* and *f*, at [KCl] = 30 and 50 mM, the  $R_g$  distribution of the ensemble shifts slightly from 27 to 26 Å. The narrower  $R_g$  distribution at [KCl] = 50 mM allows a better

definition of the ensemble because it favors some conformations with specific values of  $R_g$ .

At [KCl] = 100 mM (Fig. 3 *i*), the bimodal nature of the ensemble suggests that the HJH construct adopts two distinct conformations with  $R_g$  values centered at 23 and 27.5 Å. The coexistence of two states is not readily ascertainable from either the previous smFRET study or the Guinier analysis (57) because of data averaging during collection and processing.

As [KCl] increases to 200 mM (Fig. 3 *l*), we observe a further splitting of the distribution with peaks at  $R_g = 25$  and 34 Å. Note that the maximal possible  $R_g$  for the HJH construct is 35.5 Å, corresponding to a structure that has the central lines of H1 and H2 aligned and the junction in an A-form conformation. This extended conformation is the starting state of the MD simulations. The wide  $R_g$  distribution centered at 26 Å shows that there are still many different possible conformations for HJH molecule because of structural variations. However, the selection is quite narrow at high  $R_g$ . There are two possible explanations for these narrow peaks. First, the all-salt pool may still fail to cover the full conformational space, forcing the EOM algorithm to select only from a small number of conformations near the extended states. Second, the narrow peak may result from a restricted conformational space or the inability of HJH to explore some conformationally nearby structures once the HJH molecule is extended.

At the highest [KCl] (Fig. 3 *o*), two competing conformations exist: the extended state,  $R_g = 34$  Å, and compact state,  $R_g = 25$  Å, which resemble the states populated at [KCl] = 200 mM. The difference lies in the increased population of the extended states. Although very few extended conformations are present in the all-salt pool, EOM consistently selects those states over tens of thousands of competing conformations to improve the fit. To summarize, consistent with the results of (22), the HJH has three distinct conformational regions depending on the salt concentration. This ensemble picture provides critical insight into the structures present.

### Base stacking at high KCl concentrations

An examination of structures present in the all-salt pool but absent from the high-salt pool allows a straightforward visualization of the states that are missing in the latter. The high-salt MD simulations do not predict extended states with  $R_g > 35$  Å, whereas our analysis indicates that these states are significantly populated. These extended conformations appear at the earliest time points of the simulations but are eliminated by equilibration. They are present in the all-salt pool only because they persist in simulations at lower [KCl]. The structures of the junctions within these extended states are all similar: they display stacking of uracil 13 (U13) and 17 (U17) on top of cytosine 12 (C12) and 18 (C18), respectively (see Fig. 1) Although the

base-stacking in uracil was not seen in some studies (58,59) and the stacking free energy for uracil is assumed to be negligible in some MD force fields (60,61), ionic strength is often not considered, and it is known that stacking interactions between uracil and other nucleobases play a role in some systems (21,62). Previous studies, on the other hand, revealed that the junctions contribute significantly to RNA folding and conformations (63). The C12-U13 and U17-C18 base-stacking interactions lock the mobile helix (H2) in place and the global conformation is determined by the junction. Base stacking at high [KCl] also impacts the compact structures. The  $R_g$  of the “bent” state increases because of specific junction conformations and arrangement of the helices. The broad distribution at [KCl] = 200 mM implies conformational variation of the bent state because of the flexibility of the rU<sub>5</sub> junction. However, at 500 mM KCl, the low- $R_g$  state has a narrower distribution because the helices and junction conformations are locked in place as a result of increased stacking interaction in the rU<sub>5</sub> bases and reduced flexibility. Fig. 4 shows the number of base-stacking pairs in the region of C12–18 at different [KCl]. The fraction of stacked bases increases at high salts and peaks at 500 mM KCl. In summary, at higher salt, base stacking of uracil-cytosine (junction to helix) appears first and is followed by uracil-uracil stacking within the junction, resulting in very different conformational ensembles.

### The ensemble and smFRET measurement

The nonmonotonic behavior measured in the smFRET experiments can now be explained by the SAXS-derived HJH ensemble. Fig. 5 shows the simulated  $E_{FRET}$  values of the ensembles (red), the simulated  $E_{FRET}$  values of the 600-ns MD pools (black), and the experimental values (blue), using the methods described above. The simulated  $E_{FRET}$  of the ensemble matches the experimental measurements well at low and medium [KCl] and accurately reflects the trend at high [KCl], providing corroboration for the ensembles refined by SAXS profiles. Moreover, the large deviation of calculated  $E_{FRET}$  of the MD pool from the

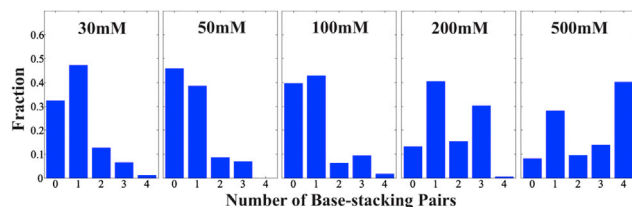

FIGURE 4 Number of base-stacking pairs in the junction (C12–18) within an ensemble at different [KCl]. Below [KCl] = 100 mM, the number of base-stacked pairs is small and mostly results from immobilization of C12 and (therefore) the highly constrained positions of U13. As [KCl] increases to 200 mM and beyond, the number increases significantly: two and three pairs are seen in 200 mM, whereas most of the bases are stacked along the junction at 500 mM. To see this figure in color, go online.

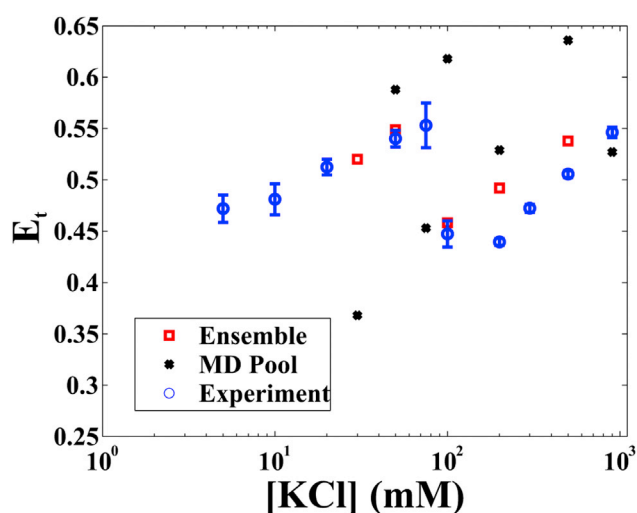

FIGURE 5 The calculated  $E_{FRET}$  of structures from the EOM-selected “all-cycle” ensemble as well as the full MD pool are plotted with the experimental data smFRET data (22). The error bars are the standard deviations of at least two independent measurements. The EOM-selected ensembles more closely capture the smFRET measurements. To see this figure in color, go online.

experimental values indicates that the SAXS refinement of the MD models is essential to accurately describe the HJH structures in KCl solutions.

### DISCUSSION

Our model system, the HJH RNA construct, contains two 12-bp helices linked by a single-stranded junction containing five uracil nucleotides. In the SAXS measurement, the x-ray photons are mostly scattered by the two electron-dense helices rather than the junction. However, the effect of the junction is pronounced because it constrains the orientations of the helices. Thus, it can be inferred if the placement of the helices is determined. Models from MD simulations are used to bridge the gap between the helical locations (extractable from a low-resolution SAXS measurement) and junction conformation. In the last section, we showed that experimental refinement of the MD results by EOM is required to recapitulate the SAXS profiles and to reveal notable features of the ensembles. Importantly, data from previous smFRET experiments are also well described by the EOM-selected ensemble, providing independent validation.

The existence of a selected set of atomically detailed models allows us to extend our analysis beyond the distribution of  $R_g$  shown in Fig. 3. Quantification of the model structures in terms of bending and twisting angles of the junction provides two axes for enhanced visualization of the results (34). The junction vector is defined as the phosphate-to-phosphate direction from C12 to C18, as shown in Fig. 1. We use the phosphorus atom of C12 as the new origin and the direction of central line of H1 as  $+z$  at  $x = x_0 > 0$ ,



$y = 0$ . The polar angle and azimuthal angles,  $(\theta, \varphi)$ , represent the bending and twisting angles of the junction using the spherical coordinate convention. Fig. 6 shows the spherical density for the bending and twisting angles of junction in the selected EOM ensembles at different [KCl]. The shifting location of the hot spot indicates the trends with increasing [KCl]: the junctions are extended at low salt, adopt two distinct (extended and bent) conformations at [KCl] = 100 mM and a more fully bent conformation at 200 mM, and finally revert to extended conformations at high salt.

The visualization is important because there are many cases in which a single macromolecular property such as  $R_g$  or  $D_{max}$  might not necessarily distinguish different conformations. Two very distinct conformational ensembles may have similar values of these parameters. Care must be taken in interpreting EOM results because many of the conformations have very similar arrangements of helices as well as junction conformations. Thus, we use the clustering algorithm described in the [Supporting Materials and Methods](#) to categorize the geometries of the HJH construct. We extract the representative conformations present in any given ensemble that occur with frequencies beyond a threshold that is set to be the average of frequencies plus two SDs. Additional representative conformations with different thresholds are shown in [Figs. S5–S9](#). The representative conformations at three different salt concentrations are shown together on the left of [Fig. 7](#), with H1 (magenta) aligned for all models. The dominant conformation is shown in red, and the others are in transparent cyan. The transparency is inversely correlated with frequency: the more frequent, the less transparent. Moreover, the junctions C12-rU<sub>5</sub>-C18 are also shown on the right, labeled with the percentages observed.

### Extended at low salt

At low salt ([KCl] = 30 mM), the HJH molecules are mostly extended with  $\sim 15$ – $25^\circ$  of bending ([Figs. 6 and 7](#)). The junction conformations do not display specific base arrange-

ments or geometries, and the junction itself is almost always extended. Three possible interactions determine the HJH conformation: electrostatic interactions, stacking of the junction bases, and coaxial stacking of the two duplexes. First, at these low salt concentrations, the negative charges of phosphates in the backbones of H1 and H2 are not locally screened because of the small number of  $K^+$  ions. Thus, repulsive forces between H1 and H2 pull them apart, leaving the junctions in indefinite, nonstructured extended states. The observed lack of ordering in the junction suggests that the strength of base-stacking interactions is negligible compared with this repulsion. The flexibility of the junction in such an extended state remains unknown. A direct measurement could be carried out to establish a persistence length (21,64) or to determine an orientation correlation function (53), but these analyses are challenging to implement for the HJH construct. Finally, although the coaxial stacking appears in many RNA systems, the stacked helices are usually found in the middle of other RNA structures, which impose a strict limitation on the available space for the duplexes. In the HJH, the helices are not constrained by other RNA elements. Considering minor end-fraying effects on the 12th and 18th Watson-Crick GC basepairs at both ends of the junction, coaxial stacking can also be excluded (65). The extension results in the large separation between H1 and H2, which echoes the previous smFRET study.

### Bimodal jump at medium salt

As [KCl] increases, the component structures in the ensemble begin to change. The HJH molecule favors the two different conformations as shown in [Figs. 6 and 7](#). Extended and bent states are observed with  $R_g$  of 27 and 23.5 Å (see [Fig. 3 i](#)). The dominant conformation, shown in red, contains the  $90^\circ$ -bent junction, comprising almost 30% of the ensemble. The rest of the conformations are relatively straight, resembling those found at low [KCl]. No backbone geometries are consistent with base stacking; therefore, these interactions appear to be negligible. The

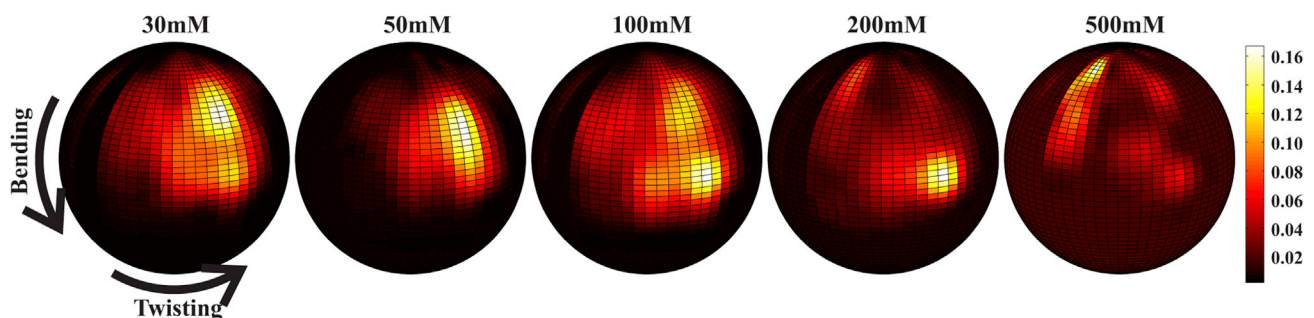

FIGURE 6 The spherical densities of the junction bending and twisting angles for structures in the optimized ensembles, shown as a function of [KCl]. The density of structures is indicated using the scale at right, with higher density regions indicated by a brighter “hot spot.” Motion of the hot spot is clearly seen, underscoring the observed structural transitions. Below  $\sim 200$  mM KCl, the angles increase. At high salt, an unexpected hot spot appears at small angles, reflecting extended states and stacked bases along the junction. To see this figure in color, go online.

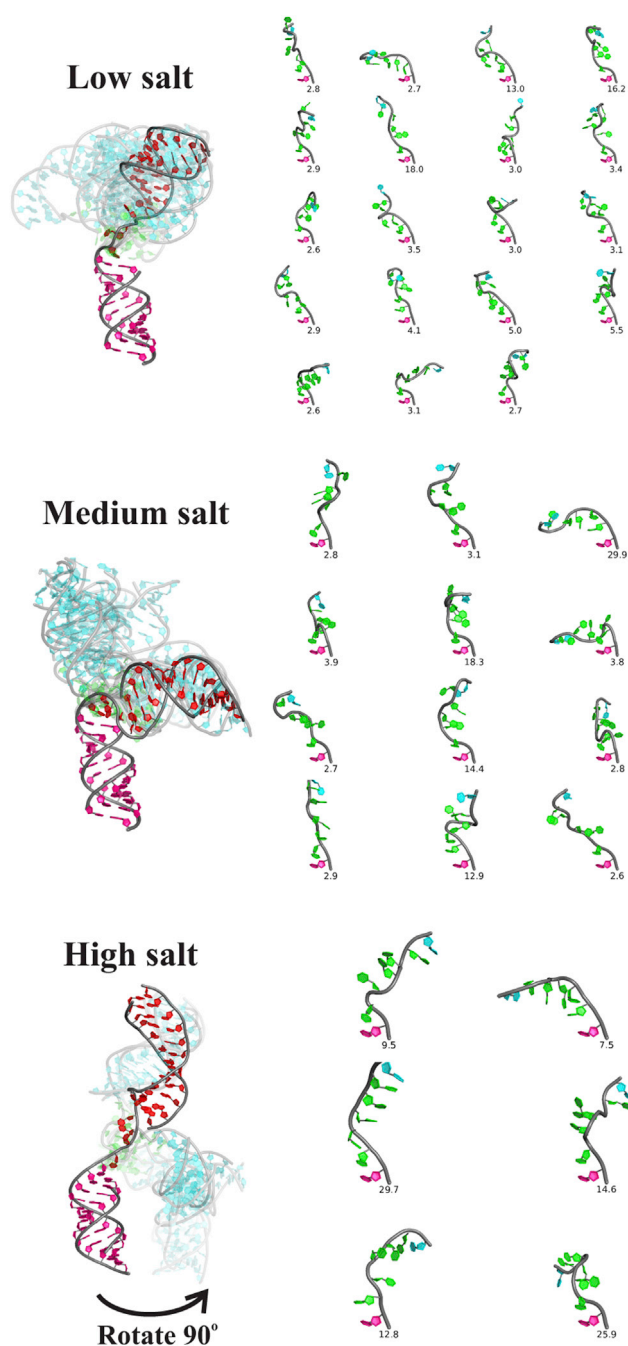

FIGURE 7 Representative conformations of HJH in different [KCl] regimes: low (30 mM), medium (100 mM), and high (500 mM). The dominant conformation is shown in red, whereas other competing conformations are shown in transparent cyan, based on the detected frequencies in the ensemble. The junction conformations are shown on the right (C12-UUUU-C18), with a label reflecting the percentage observed. This figure was generated by PyMOL (Schrödinger LLC, New York, NY) using home-written Python scripts. To see this figure in color, go online.

closer separations between helices observed in the bent state but absent in the low [KCl] ensembles is consistent with the greater local screening. These two states are most easily seen in the 600-ns MD simulations. The two peaks corre-

spond to different states: “extended” versus “bent.” Some RNA systems show multiple states under the physiological salt conditions (66). The approximately equal contribution of both states indicates that the conformational landscape of this HJH has two or more readily accessible shallow local minima.

### Locked conformations at high salt

Unexpected conformations become populated at higher salt concentrations. One would expect that electrostatic repulsion would be strongly screened, resulting in the broadest range of conformations (23) because helices are freer to explore a larger three-dimensional space. However, the selected structural ensemble at the bottom of Fig. 7 suggests a richer story. For clarity of visualization, the structures are rotated 90° counterclockwise to show the bent states. Some structures are in the antiparallel bent states, in which most of the nucleobases in the junction are involved in base stacking with neighbors, while the dominant state is extended. From the junction conformations shown on the right, the most frequent conformation has all the bases stacked with either C12 or C18. The stacking interactions between uracil bases and cytosine bases lock the junction into a specific form, placing the H1 and H2 in parallel extended conformations. Although some antiparallel bent states also populate the ensemble, extended states with  $R_g$  of 34.5 Å are dominant (Fig. 3 o), corresponding to HJH structures with coaxially aligned helices and A-form junction conformation. These extended states do not appear in the MD simulations at high salt. The equilibration eliminates a few starting conformations. MD force fields only suggest the antiparallel bent states in the later time points of simulations. It is relatively unlikely for these states to unfold back to their initial conformations (coaxially aligned helices) in the MD simulations without adequate base interactions. Interestingly, the latest, revised force field parameters for RNAs predict unconventional base-stacking patterns of rU<sub>4</sub> (28), but further experimental confirmation is required.

Finally, the locations of ions in the MD simulations provide some insight into the cause of uracil-uracil and uracil-cytosine base-stacking interactions: there is a strong association of counterions with O2 and O2' in the uracil that takes place when the nucleobases stack. The counterions neutralize the negative charges on O2 and O2', reducing the local electrostatic repulsion between the adjacent bases. The weaker base-stacking interactions of uracil in some of the previous work might be due to the exclusion of counterions or the pairing and burying of bases inside the duplex (60,61). The exposure of the uracil bases to the solvent environment makes possible counterion binding to O2 and O2', which are two hot spots for local strong electrostatic repulsions. In addition, the hydrophobic effect increases with added salt in solutions (67). The uracil bases are also in direct contact with the ion environment. The  $\pi$

stacking interactions thus become stronger, locking the adjacent nucleobases in place. These interactions not only facilitate the specific base arrangements but also determine the backbone geometries. In contrast to conformations found at low and medium [KCl], the junction stiffens and constrains the two duplexes.

## CONCLUSIONS

In summary, we used SAXS and MD to extend an earlier smFRET study of a flexible RNA HJH construct. We compare the MD-generated structures and use a genetic algorithm to optimize a solution ensemble, obtaining the best fit to our experimental SAXS profiles. The resulting ensembles suggest three distinct conformational regimes: indefinite extended at low, bimodal states at medium, and parallel-antiparallel states at high [KCl] due to specific base alignment of rU<sub>5</sub>. Association of ions to neutralize local electronegativity and enhanced hydrophobic effect explain the observed base stacking. Finally, the calculated  $E_{FRET}$  from ensembles also agrees with the experimental data. We demonstrate that the combination of SAXS and MD reveals multiple macro- and microscopic properties of small RNA molecules and uniquely enables the visualization of conformational ensembles.

## SUPPORTING MATERIAL

Supporting Materials and Methods, nine figures, and one table are available at [http://www.biophysj.org/biophysj/supplemental/S0006-3495\(18\)31285-2](http://www.biophysj.org/biophysj/supplemental/S0006-3495(18)31285-2).

## AUTHOR CONTRIBUTIONS

Y.-L.C. and L.P. designed and carried out experiments. T.L. and R.E. designed and carried out MD simulations. All authors contributed to writing the manuscript.

## ACKNOWLEDGMENTS

The authors thank Arthur Woll, Richard Gillilan, and Pollack Lab members for experimental assistance and helpful discussions. The authors also thank Suzette. A. Pabit for reviewing the manuscript.

This work was supported by National Institutes of Health grants R01 GM085062 and R35 GM122514. SAXS data were taken at CHESS. CHESS is supported by the National Science Foundation and National Institutes of Health/National Institute of General Medical Science via National Science Foundation Award No. DMR-1332208, and the MacCHESS resource is funded by National Institute of General Medical Science Award No. GM-103485.

## REFERENCES

- Amara, S. G., V. Jonas, ..., R. M. Evans. 1982. Alternative RNA processing in calcitonin gene expression generates mRNAs encoding different polypeptide products. *Nature*. 298:240–244.
- McCaffrey, A. P., L. Meuse, ..., M. A. Kay. 2002. RNA interference in adult mice. *Nature*. 418:38–39.
- Jackson, A. L., S. R. Bartz, ..., P. S. Linsley. 2003. Expression profiling reveals off-target gene regulation by RNAi. *Nat. Biotechnol.* 21:635–637.
- Tucker, B. J., and R. R. Breaker. 2005. Riboswitches as versatile gene control elements. *Curr. Opin. Struct. Biol.* 15:342–348.
- Robertson, D. L., and G. F. Joyce. 1990. Selection in vitro of an RNA enzyme that specifically cleaves single-stranded DNA. *Nature*. 344:467–468.
- Steitz, T. A., and J. A. Steitz. 1993. A general two-metal-ion mechanism for catalytic RNA. *Proc. Natl. Acad. Sci. USA*. 90:6498–6502.
- Scott, W. G., J. B. Murray, ..., A. Klug. 2015. Capturing the structure of a catalytic RNA intermediate: the hammerhead ribozyme. *Science*. 274:2065–2069.
- Walter, N. G., D. A. Harris, ..., D. Rueda. 2001–2002. In the fluorescent spotlight: global and local conformational changes of small catalytic RNAs. *Biopolymers*. 61:224–242.
- Hermann, T. 2002. Rational ligand design for RNA: the role of static structure and conformational flexibility in target recognition. *Biochimie*. 84:869–875.
- Chang, A. L., J. J. Wolf, and C. D. Smolke. 2012. Synthetic RNA switches as a tool for temporal and spatial control over gene expression. *Curr. Opin. Biotechnol.* 23:679–688.
- Dethoff, E. A., J. Chugh, ..., H. M. Al-Hashimi. 2012. Functional complexity and regulation through RNA dynamics. *Nature*. 482:322–330.
- Rambo, R. P., and J. A. Tainer. 2010. Bridging the solution divide: comprehensive structural analyses of dynamic RNA, DNA, and protein assemblies by small-angle X-ray scattering. *Curr. Opin. Struct. Biol.* 20:128–137.
- Tainer, J. A. 2011. X-Ray scattering (SAXS) combined with crystallography and computation: defining accurate macromolecular structures, conformations and assemblies in solution. *Biophys. J.* 100:38a.
- Burke, J. E., and S. E. Butcher. 2012. Nucleic acid structure characterization by small angle X-ray scattering (SAXS). *Curr. Protoc. Nucleic Acid Chem.* Chapter 7:Unit7.18.
- Koch, M. H., P. Vachette, and D. I. Svergun. 2003. Small-angle scattering: a view on the properties, structures and structural changes of biological macromolecules in solution. *Q. Rev. Biophys.* 36:147–227.
- McKnight, K. L., and B. A. Heinz. 2003. RNA as a target for developing antivirals. *Antivir. Chem. Chemother.* 14:61–73.
- Cooper, T. A., L. Wan, and G. Dreyfuss. 2009. RNA and disease. *Cell*. 136:777–793.
- Burnett, J. C., and J. J. Rossi. 2012. RNA-based therapeutics: current progress and future prospects. *Chem. Biol.* 19:60–71.
- Ferner, J. P., E. D. Ferner, ..., H. Schwalbe. 2012. RNA as a drug target. *In* NMR of Biomolecules: Towards Mechanistic Systems Biology. I. Bertini, ..., eds. Wiley-Blackwell, pp. 298–313.
- Schlatterer, J. C., L. W. Kwok, ..., L. Pollack. 2008. Hinge stiffness is a barrier to RNA folding. *J. Mol. Biol.* 379:859–870.
- Chen, H., S. P. Meisburger, ..., L. Pollack. 2012. Ionic strength-dependent persistence lengths of single-stranded RNA and DNA. *Proc. Natl. Acad. Sci. USA*. 109:799–804.
- Sutton, J. L., and L. Pollack. 2015. Tuning RNA flexibility with helix length and junction sequence. *Biophys. J.* 109:2644–2653.
- Bai, Y., V. B. Chu, ..., S. Doniach. 2008. Critical assessment of nucleic acid electrostatics via experimental and computational investigation of an unfolded state ensemble. *J. Am. Chem. Soc.* 130:12334–12341.
- Kebbekus, P., D. E. Draper, and P. Hagerman. 1995. Persistence length of RNA. *Biochemistry*. 34:4354–4357.
- Abels, J. A., F. Moreno-Herrero, ..., N. H. Dekker. 2005. Single-molecule measurements of the persistence length of double-stranded RNA. *Biophys. J.* 88:2737–2744.

26. Yang, S., L. Salmon, and H. M. Al-Hashimi. 2014. Measuring similarity between dynamic ensembles of biomolecules. *Nat. Methods*. 11:552–554.
27. Vangaveti, S., S. V. Ranganathan, and A. A. Chen. 2017. Advances in RNA molecular dynamics: a simulator's guide to RNA force fields. *Wiley Interdiscip. Rev. RNA*. 8:e1396, Published online October 4, 2016.
28. Tan, D., S. Piana, ..., D. E. Shaw. 2018. RNA force field with accuracy comparable to state-of-the-art protein force fields. *Proc. Natl. Acad. Sci. USA*. 115:E1346–E1355.
29. Salmon, L., S. Yang, and H. M. Al-Hashimi. 2014. Advances in the determination of nucleic acid conformational ensembles. *Annu. Rev. Phys. Chem.* 65:293–316.
30. Adams, P. D., D. Baker, ..., T. C. Terwilliger. 2013. Advances, interactions, and future developments in the CNS, Phenix, and Rosetta structural biology software systems. *Annu. Rev. Biophys.* 42:265–287.
31. Bernadó, P., E. Mylonas, ..., D. I. Svergun. 2007. Structural characterization of flexible proteins using small-angle X-ray scattering. *J. Am. Chem. Soc.* 129:5656–5664.
32. Plumridge, A., A. M. Katz, ..., L. Pollack. 2018. Revealing the distinct folding phases of an RNA three-helix junction. *Nucleic Acids Res.* 46:7354–7365.
33. Casiano-Negroni, A., X. Sun, and H. M. Al-Hashimi. 2007. Probing Na(+)-induced changes in the HIV-1 TAR conformational dynamics using NMR residual dipolar couplings: new insights into the role of counterions and electrostatic interactions in adaptive recognition. *Biochemistry*. 46:6525–6535.
34. Shi, X., P. Walker, ..., D. Herschlag. 2017. Determination of the conformational ensemble of the TAR RNA by X-ray scattering interferometry. *Nucleic Acids Res.* 45:e64.
35. Tria, G., H. D. Mertens, ..., D. I. Svergun. 2015. Advanced ensemble modelling of flexible macromolecules using X-ray solution scattering. *IUCrJ*. 2:207–217.
36. Barberato, C., D. Svergun, and M. H. J. Koch. 1995. CRY SOL - a program to evaluate X-ray solution scattering of biological macromolecules from atomic coordinates. *J. Appl. Cryst.* 28:768–773.
37. Yang, S., and H. M. Al-Hashimi. 2015. Unveiling inherent degeneracies in determining population-weighted ensembles of interdomain orientational distributions using NMR residual dipolar couplings: application to RNA helix junction helix motifs. *J. Phys. Chem. B*. 119:9614–9626.
38. Macke, T. J., and D. A. Case. 2009. Modeling unusual nucleic acid structures. *ACS Symposium Series*. 682:379–393.
39. Kirmizialtin, S., and R. Elber. 2010. Computational exploration of mobile ion distributions around RNA duplex. *J. Phys. Chem. B*. 114:8207–8220.
40. Kirmizialtin, S., A. R. Silalahi, ..., M. O. Fenley. 2012. The ionic atmosphere around A-RNA: Poisson-Boltzmann and molecular dynamics simulations. *Biophys. J.* 102:829–838.
41. Cornell, W. D., P. Cieplak, ..., P. A. Kollman. 1995. A second generation force field for the simulation of proteins, nucleic acids, and organic molecules. *J. Am. Chem. Soc.* 117:5179–5197.
42. Pranata, J., S. G. Wierschke, and W. L. Jorgensen. 1991. OPLS potential functions for nucleotide bases. Relative association constants of hydrogen-bonded base pairs in chloroform. *J. Am. Chem. Soc.* 113:2810–2819.
43. Jorgensen, W. L., and J. Tirado-Rives. 1988. The OPLS [optimized potentials for liquid simulations] potential functions for proteins, energy minimizations for crystals of cyclic peptides and crambin. *J. Am. Chem. Soc.* 110:1657–1666.
44. Åqvist, J. 1990. Ion-water interaction potentials derived from free energy perturbation simulations. *J. Phys. Chem.* 94:8021–8024.
45. Ross, W. S., and C. C. Hardin. 1994. Ion-induced stabilization of the G-DNA quadruplex: free energy perturbation studies. *J. Am. Chem. Soc.* 116:6070–6080.
46. Elber, R., A. Roitberg, ..., A. Ulitsky. 1995. MOIL: a program for simulations of macromolecules. *Comput. Phys. Commun.* 91:159–189.
47. Ruymgaart, A. P., A. E. Cardenas, and R. Elber. 2011. MOIL-opt: energy-conserving molecular dynamics on a GPU/CPU system. *J. Chem. Theory Comput.* 7:3072–3082.
48. Essmann, U., L. Perera, ..., L. G. Pedersen. 1995. A smooth particle mesh Ewald method. *J. Chem. Phys.* 103:8577–8593.
49. Ryckaert, J. P., G. Ciccotti, and H. J. C. Berendsen. 1977. Numerical integration of the cartesian equations of motion of a system with constraints: molecular dynamics of n-alkanes. *J. Comput. Phys.* 23:327–341.
50. Weinbach, Y., and R. Elber. 2005. Revisiting and parallelizing SHAKE. *J. Comput. Phys.* 209:193–206.
51. Nir, E., X. Michalet, ..., S. Weiss. 2006. Shot-noise limited single-molecule FRET histograms: comparison between theory and experiments. *J. Phys. Chem. B*. 110:22103–22124.
52. Petoukhov, M. V., D. Franke, ..., D. I. Svergun. 2012. New developments in the ATSAS program package for small-angle scattering data analysis. *J. Appl. Crystallogr.* 45:342–350.
53. Plumridge, A., S. P. Meisburger, and L. Pollack. 2017. Visualizing single-stranded nucleic acids in solution. *Nucleic Acids Res.* 45:e66.
54. Shi, X., K. A. Beauchamp, ..., D. Herschlag. 2014. From a structural average to the conformational ensemble of a DNA bulge. *Proc. Natl. Acad. Sci. USA*. 111:E1473–E1480.
55. Karplus, M., and G. A. Petsko. 1990. Molecular dynamics simulations in biology. *Nature*. 347:631–639.
56. Zhang, C., S. Raugei, ..., P. Carloni. 2010. Molecular dynamics in physiological solutions: force fields, alkali metal ions, and ionic strength. *J. Chem. Theory Comput.* 6:2167–2175.
57. Guinier, A., and G. Fournet. 1955. Small-angle Scattering of X-rays. John Wiley & Sons, Inc., Hoboken, NJ.
58. Jacques, R. 1963. Molecular properties and conformation of polyribouridylic acid. *Biopolymers*. 1:431–446.
59. Inners, L. D., and G. Felsenfeld. 1970. Conformation of polyribouridylic acid in solution. *J. Mol. Biol.* 50:373–389.
60. Condon, D. E., S. D. Kennedy, ..., D. H. Turner. 2015. Stacking in RNA: NMR of four tetramers benchmark molecular dynamics. *J. Chem. Theory Comput.* 11:2729–2742.
61. Brown, R. F., C. T. Andrews, and A. H. Elcock. 2015. Stacking free energies of all DNA and RNA nucleoside pairs and dinucleoside-monophosphates computed using recently revised AMBER parameters and compared with experiment. *J. Chem. Theory Comput.* 11:2315–2328.
62. Lee, C. H., F. S. Ezra, ..., S. S. Danyluk. 1976. Conformational properties of dinucleoside monophosphates in solution: dipurines and dipyrimidines. *Biochemistry*. 15:3627–3639.
63. Chu, V. B., J. Lipfert, ..., D. Herschlag. 2009. Do conformational biases of simple helical junctions influence RNA folding stability and specificity? *RNA*. 15:2195–2205.
64. Hansma, H. G., I. Revenko, ..., D. E. Laney. 1996. Atomic force microscopy of long and short double-stranded, single-stranded and triple-stranded nucleic acids. *Nucleic Acids Res.* 24:713–720.
65. Zgarbová, M., M. Otyepka, ..., P. Jurečka. 2014. Base pair fraying in molecular dynamics simulations of DNA and RNA. *J. Chem. Theory Comput.* 10:3177–3189.
66. Solomatin, S. V., M. Greenfeld, ..., D. Herschlag. 2010. Multiple native states reveal persistent ruggedness of an RNA folding landscape. *Nature*. 463:681–684.
67. Mancera, R. L. 1998. Does salt increase the magnitude of the hydrophobic effect? A computer simulation study. *Chem. Phys. Lett.* 296:459–465.

**Biophysical Journal, Volume 116**

**Supplemental Information**

**Conformations of an RNA Helix-Junction-Helix Construct Revealed by  
SAXS Refinement of MD Simulations**

**Yen-Lin Chen, Tongsik Lee, Ron Elber, and Lois Pollack**

## Clustering HJH Geometries

It is essential to cluster the HJH conformations into groups with similar structures, as many of the MD generated conformations are highly degenerate. A typical EOM ensemble contains approximately 30,000 to 45,000 conformations depending on the number of cycles of genetic algorithm. It is naive to assume that the representative structures are those that are selected more than a certain number of times. Many of the selected conformers are degenerate and may, in combination, outnumber the above-threshold states and confound the results. An alternate approach is to cluster structurally similar conformations into separate groups. Of the many clustering algorithms that exist for biomolecules, some are RMSD-based<sup>1-3</sup> while others are based on overlapping volumes of two states<sup>4</sup>. These approaches are suitable to describe the relative positions of the two helices in the HJH molecule, but place little emphasis on the junction conformation. We seek a method that accounts for both helix position and junction geometry with similar weighting.

To cluster the structures in a way that considers both the helices and junction, we must first identify a way to classify the different models (in a data matrix  $M(0)$  where ‘0’ indicates the step 0), which provides details about both, yet remains computationally reasonable. We considered several possible parameterizations. The four different parameterizations we considered are in Fig. S1. The “backbone” matrix contains the coordinates of all the phosphorus atoms in the backbone and contributes 159 features to  $M(0)$ . The “backbone+5U bases” matrix contains all the backbone data as well as the coordinates of 5 uracil rings in the junction: 90 extra features. The “Backbone+5U geometry” matrix contains the backbone data, center of mass and the normal vector of the uracil rings. Due to different types of data in the matrix, each feature is normalized before clustering:

$$f'_i = \frac{f_i - \langle f_i \rangle}{\sigma(f_i)} \quad \#(S1)$$

The  $f'_i$  and  $f_i$  are the normalized and raw data of the  $i^{\text{th}}$  features and  $\langle f_i \rangle$  and  $\sigma(f_i)$  denote the mean and standard deviation of the raw data respectively. Finally, the “All Atom” matrix is the normal all-atom RMSD method where 5061 features are clustered. The RMSD values increase as the clustering algorithm proceeds and the later clusters ( $n > 0.8K$ ) usually have worse mutual structural similarity within one cluster.

For the “Backbone” and “All Atom” matrix, the junction geometry features are overshadowed by the two helices therefore the results fail to take the junction base arrangement into account. In addition, the “All Atom” matrix is computationally expensive to cluster. Similarly, the “Backbone+5U geometry” also loses track of the junction because the geometry information is scarce compared to the backbone of the duplexes. The best parameterization appears to be the “Backbone+5U bases” matrix which balances the contribution of the helices and the junction geometry by adding all the atoms in the uracil rings. It also does not take too much computational time.

To carry out the clustering using the “Backbone+5U bases” set, we extracted the geometries of the backbones of H1 and H2 as 48 sets of coordinates. We also extracted the backbone and base coordinates of the nucleotides in the junction, as sets of ring (6) and backbone (1) coordinates of the 5 uracils. These numbers, 144 ( $48 \times 3$ ) and 105 ( $7 \times 5 \times 3$ ) features for the helices and junction respectively, are placed in  $M(0)$ . We apply the following algorithm using the K-means clustering<sup>5</sup> of the built-in MATLAB function, *kmeans*, on  $M(0)$ . There is also no restriction on the number of clusters  $K$ . The procedure is as follows:

1. Run K-means on  $M(0)$  of  $K$  clusters for all the conformations with 249 features.

2. Find the best cluster B(1) among K clusters based on the RMSD value of 249 features.
3. Remove elements in B(1) from M(0) as M(1).
4. Repeat step 1 through 3 using K-i clusters on M(i) for K times.

In contrast to the standard K-means clustering, the matrix M(0) doesn't need to be normalized to avoid possible error-prone weighting because each feature in M(0) is a 3D coordinate. Finally, we end up with K clusters. In general, the structures in later clusters have less mutual similarity than those in the earlier ones. The last ( $K^{\text{th}}$ ) cluster only contains the residues of the previous steps. The reason for the recursive K-means is to improve the accuracy of the clustering while trading off computation time. The mutual similarity within one cluster is good until the  $n^{\text{th}}$  cluster, where  $n \sim 0.8K$ . With clustering, we combine all the degenerate states and their corresponding frequencies for further analysis.

The structures of selected clusters are shown in Fig. S2. The earlier clusters have good similarity until cluster #80 beyond which the clusters look more chaotic and cannot be considered as a single representative structure. The last cluster, cluster #100, contains the leftover structures.

### Parameters for GAJOE

We used several sets of parameters in Table. S1. for the genetic algorithm program, GAJOE, to match the size of the pool.

|                             | Subpool – 200ns | Subpool – 600ns | All-salt pool |
|-----------------------------|-----------------|-----------------|---------------|
| # of structures in the pool | ~ 2,980*        | ~ 13,000        | 22,540        |
| # of generations            | 1,000           | 5,000           | 10,000        |
| # of ensembles              | 50              | 50              | 50            |
| Ensemble size fixed?        | no              | no              | no            |
| Max # of curves             | 20              | 20              | 20            |
| Min # of curves             | 5               | 5               | 5             |
| Curve repetition            | yes             | yes             | yes           |
| Constant subtraction        | yes             | yes             | yes           |
| # of genetic algorithms     | 150             | 150             | 150           |

Table S1. GAJOE parameters used for different pools. \*The subpool for  $[KCl] = 500\text{mM}$  is also applied by the same set of parameter despite of fewer structures.

### EOM Fit of All [KCl]

The EOM fitting to the experimental SAXS profiles with  $\chi^2$  listed is shown in Fig. S3. At high  $[KCl] = 500\text{mM}$ , the fitting is improved by the inclusion of extended models generated in lower  $[KCl]$  simulations.

### End-to-end Distance Distribution

The distributions of end-to-end distance (d) of the pool (red), “all-cycle” ensemble (blue) and “best-cycle” ensemble (green) are shown in Fig. S4. The end-to-end distance of HJH is calculated using the separation of the phosphorus atoms at the 5' and 3' end. The bimodal distribution also appears at medium salt where  $[KCl] = 100\text{mM}$ , with  $d \sim 60$  and  $80\text{\AA}$ . These two states split further as  $[KCl]$  increases and the base-stacking comes into play at high salt, resulting in the extended HJH conformation with  $d = 92\text{\AA}$ . The subpools at  $[KCl] = 500\text{mM}$  are also missing the extended conformations as seen in the  $R_g$  distribution.

### Different Thresholding Values

The HJH solution ensemble with different threshold values and junction conformations are shown in Fig. S5 – Fig. S9 for [KCl] series. The thresholds are set to be the mean  $\pm$  one standard deviation.

### Supporting References

1. Betancourt, M. R. & Skolnick, J. Universal similarity measure for comparing protein structures. *Biopolymers* **59**, 305–309 (2001).
2. Zemla, A. LGA: A method for finding 3D similarities in protein structures. *Nucleic Acids Res.* **31**, 3370–3374 (2003).
3. Petoukhov, M. V. *et al.* New developments in the ATSAS program package for small-angle scattering data analysis. *J. Appl. Crystallogr.* **45**, 342–350 (2012).
4. Rodrigues, J. P. G. L. M. *et al.* Clustering biomolecular complexes by residue contacts similarity. *Proteins Struct. Funct. Bioinforma.* **80**, 1810–1817 (2012).
5. MacQueen, J. *Some methods for classification and analysis of multivariate observations. In Fifth Berkeley Symposium on Mathematical Statistics and Probability.* (University of California Press, Berkeley, CA. 666, 1967).



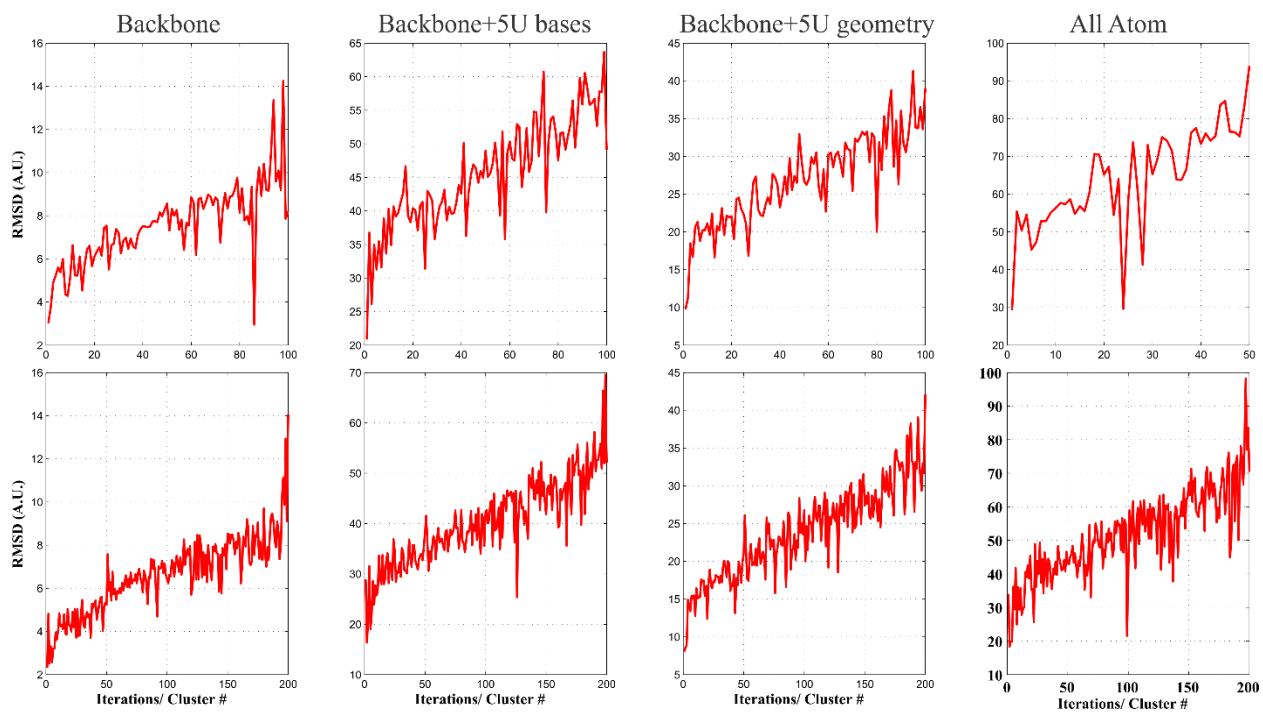

**Figure S1.** The best-RMSD traces of clustering using different data matrix  $M$  for different  $K$  value of 100 and 200. Backbone: coordinates of all phosphorus atoms in HJH, features = 159; Backbone+5U bases: backbone coordinates and the 6 atoms of uracil rings, features = 249; Backbone+5U geometry: backbone coordinates and the COM and normal vectors of uracil rings, features = 189; All atom: all atoms of HJH, features = 5,061.

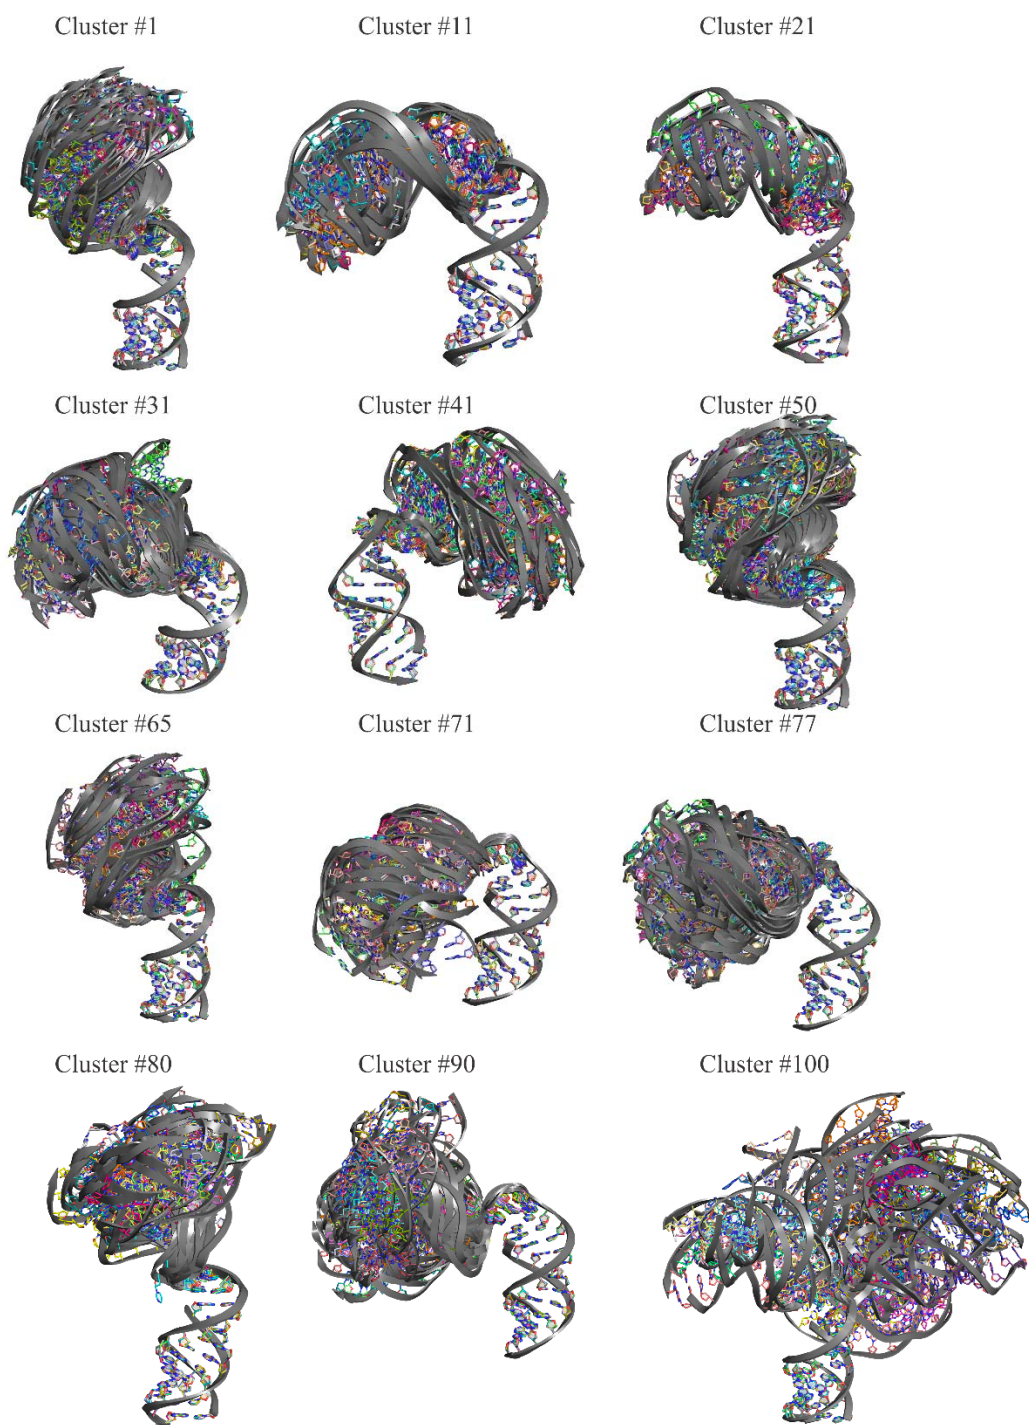

**Figure S2.** The structures in one cluster using the “Backbone+5U bases” and  $K=100$ . The performance is good until cluster #  $n$ , where  $n \sim 0.8K=80$  in this case. For cluster #80, the best-RMSD increases to more than twice of cluster #1. Prior to cluster #80, the structures within certain cluster are similar to each other. Notice that the use of atoms in the uracil rings accounts for junction geometries.

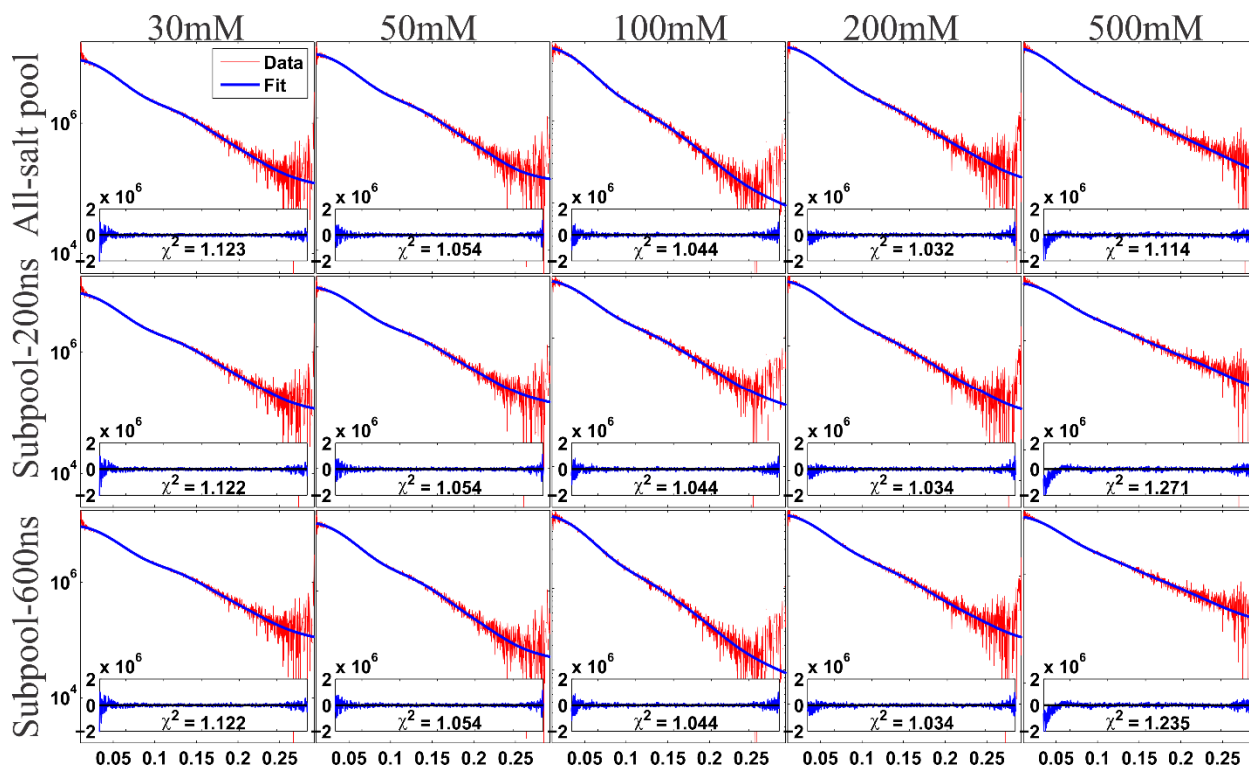

**Figure S3.** The EOM fitting to all the SAXS profiles using different search pools.

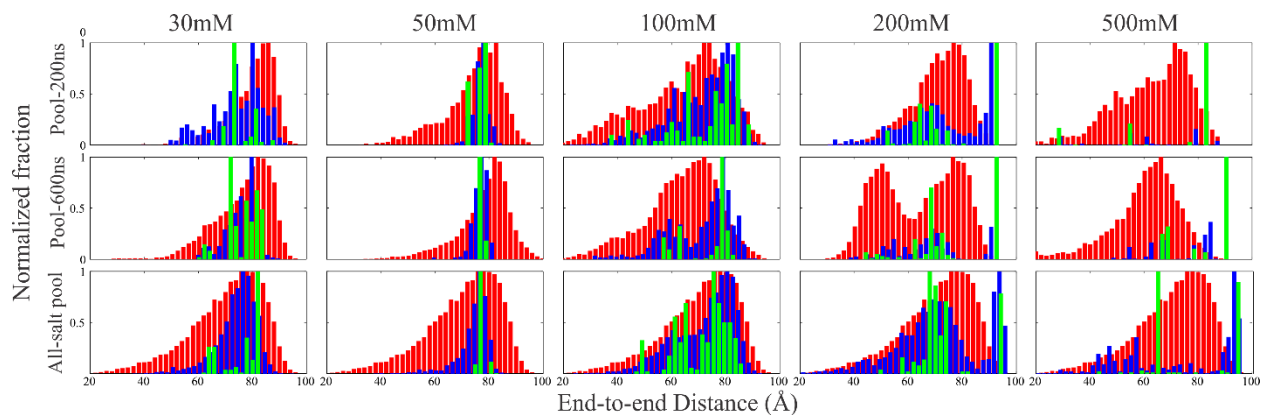

**Figure S4.** Distribution of end-to-end distance at different [KCl] using different search pools. The red bars show the distribution of the pool while the blue and green ones are the distributions from the "all-cycle" and "best-cycle" analysis respectively. Each distribution is normalized by the maximum number of counts for presentation purposes.

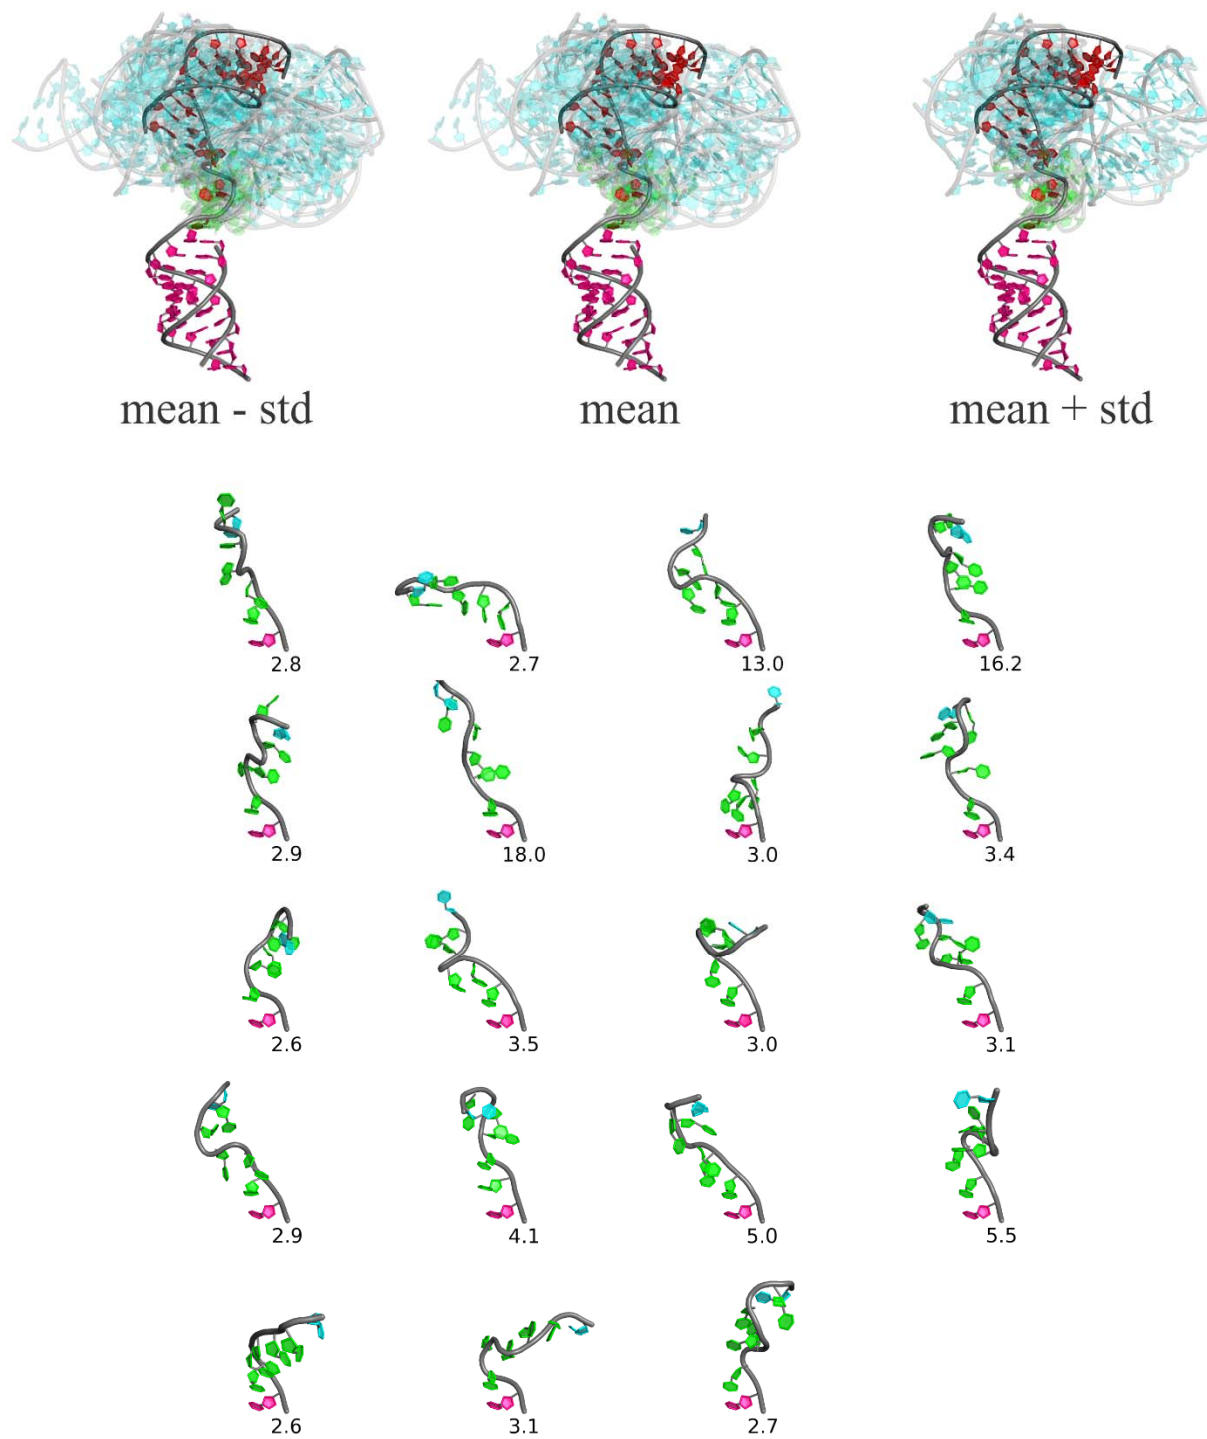

**Figure S5.** The ensemble and junction conformations at  $[KCl] = 30mM$ .

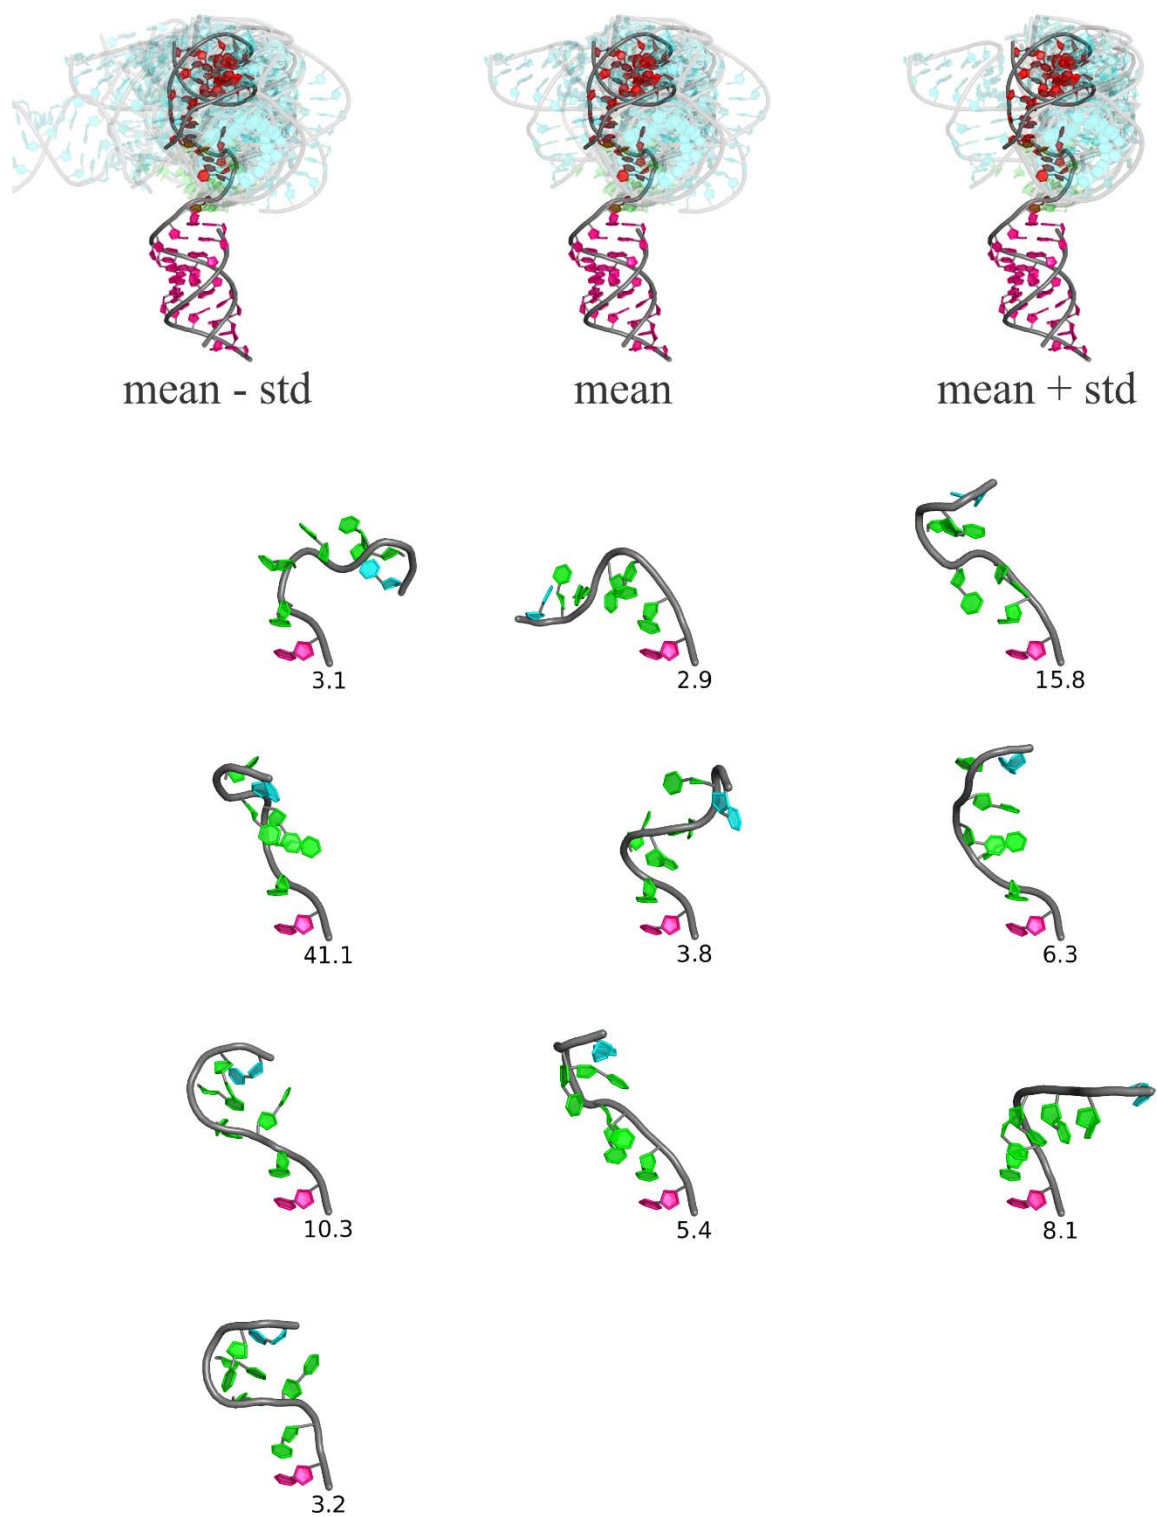

**Figure S6.** The ensemble and junction conformation at  $[KCl] = 50mM$ .

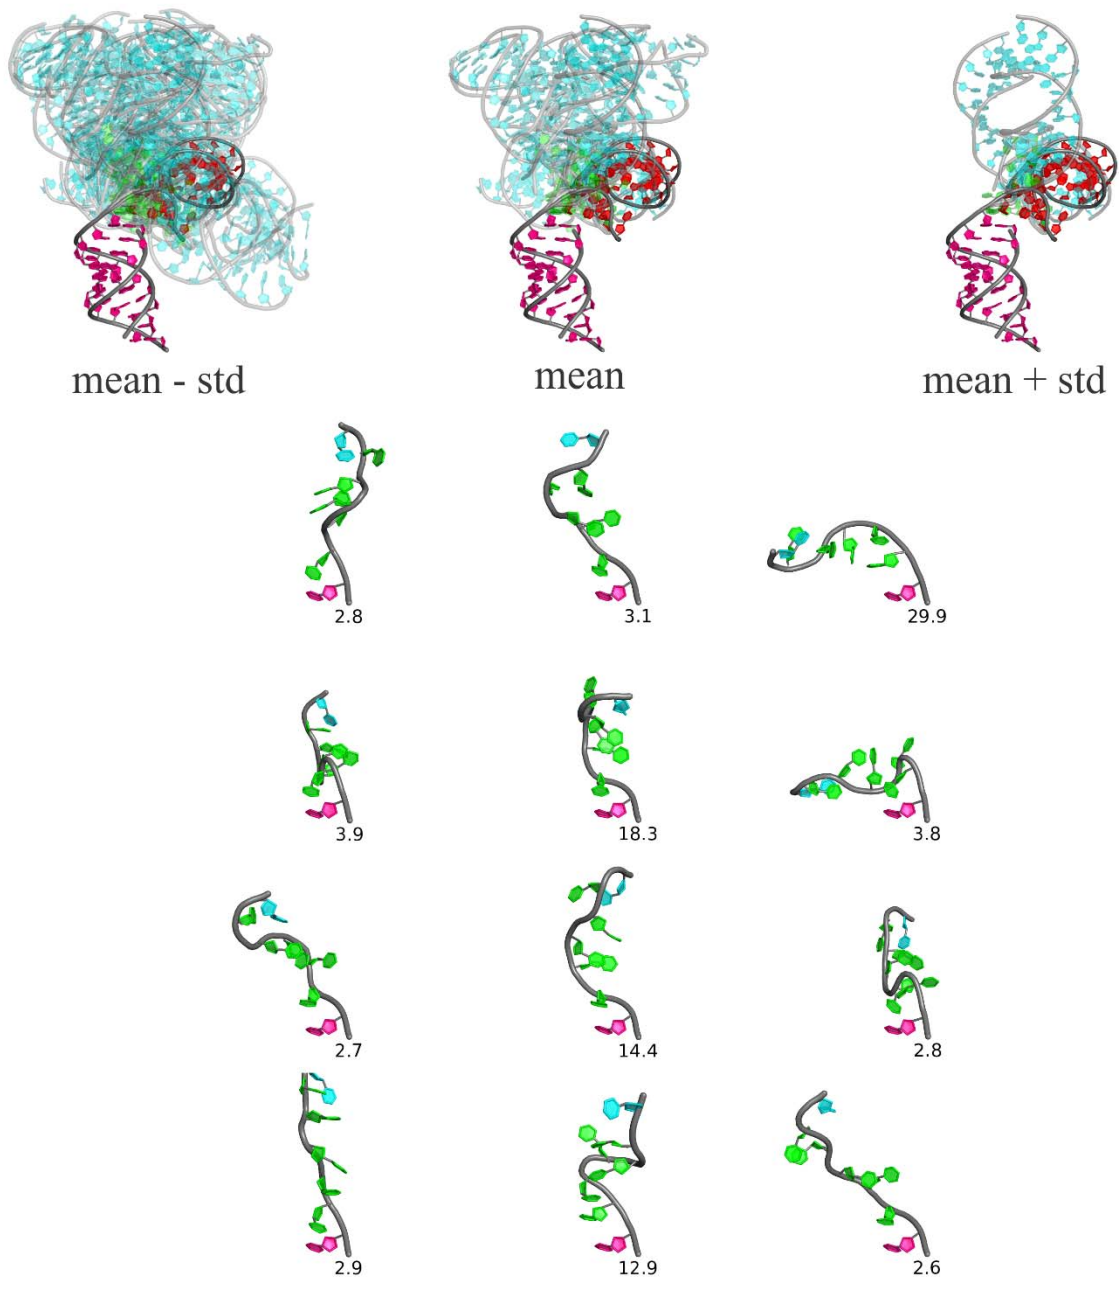

**Figure S7.** The ensemble and junction conformation at  $[KCl] = 100mM$ .

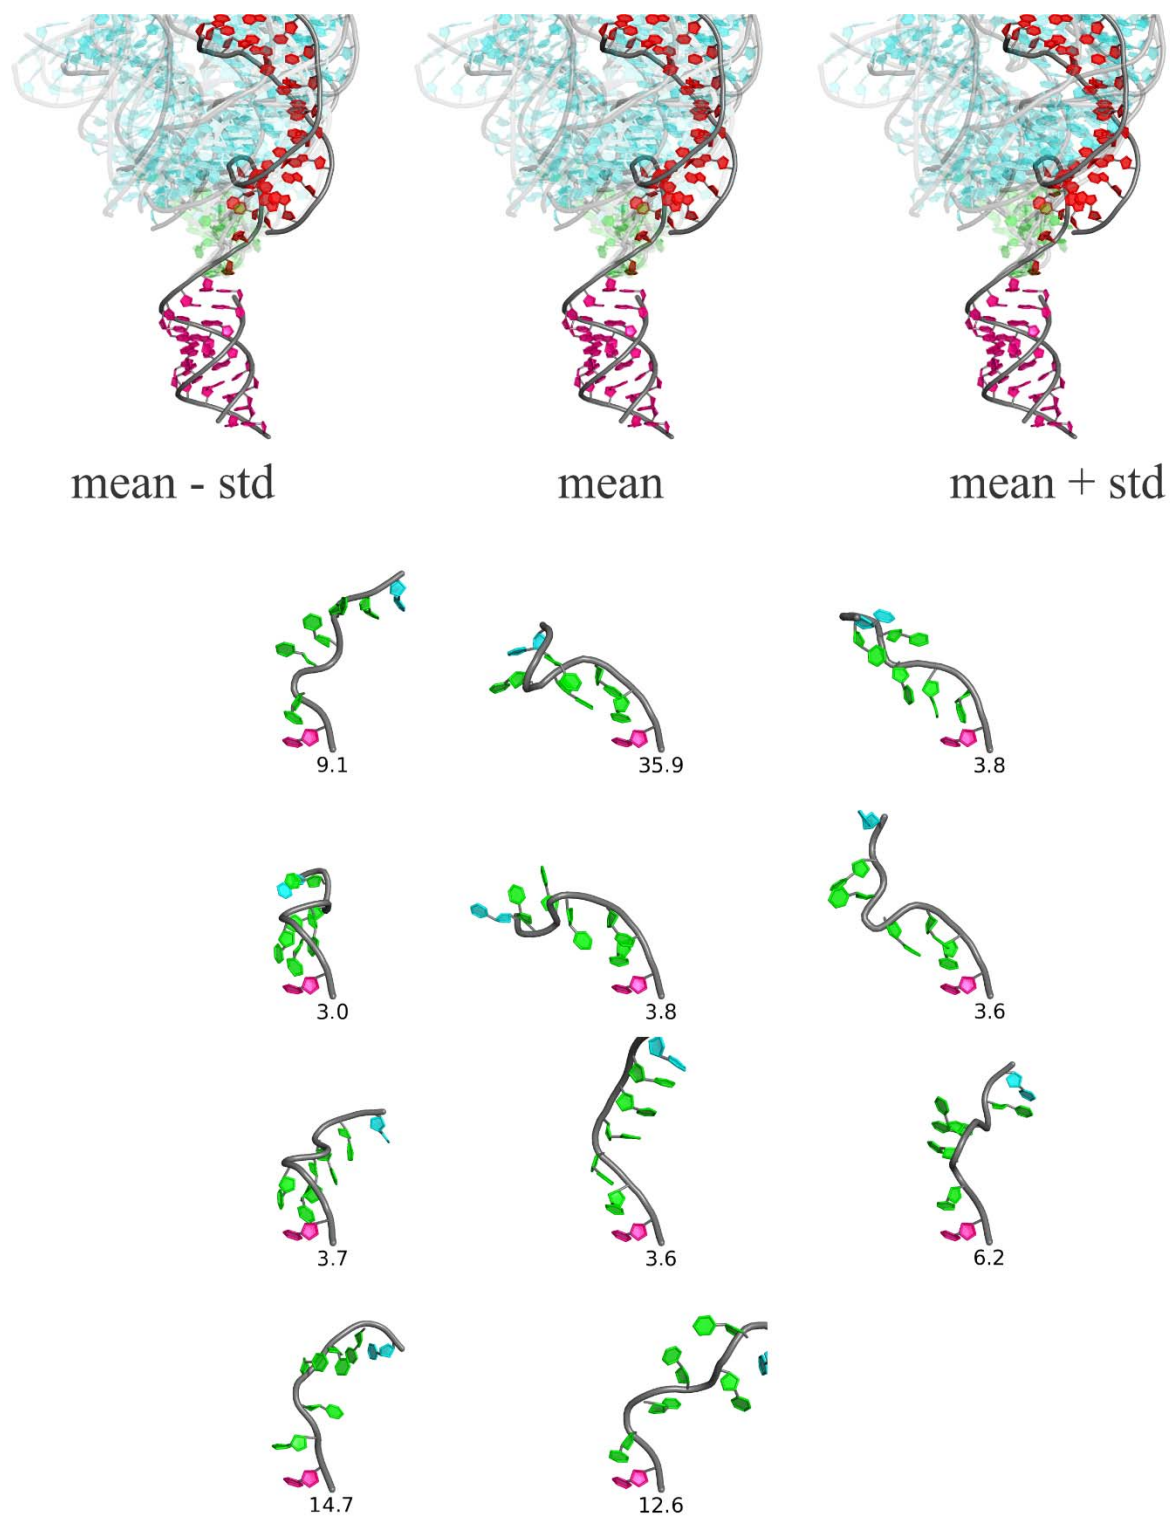

**Figure S8.** The ensemble and junction conformation at  $[KCl] = 200mM$ .

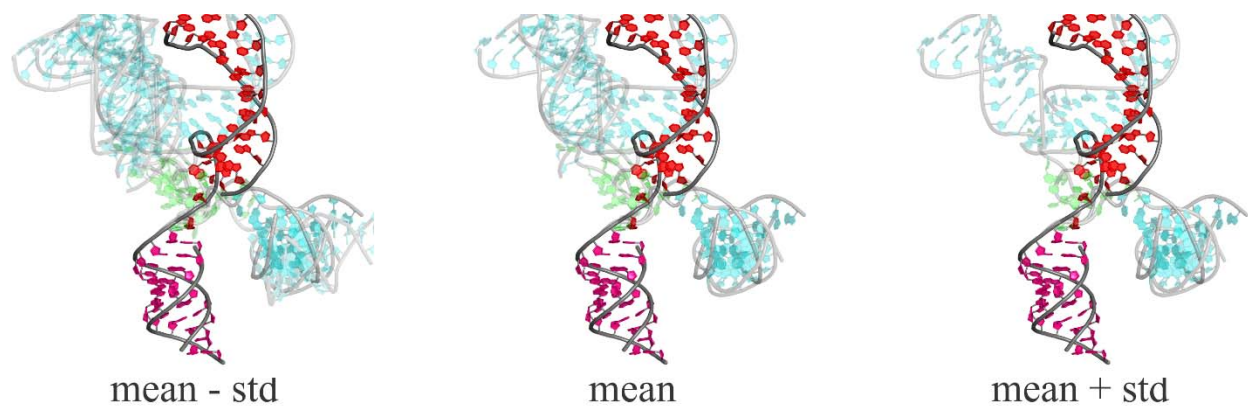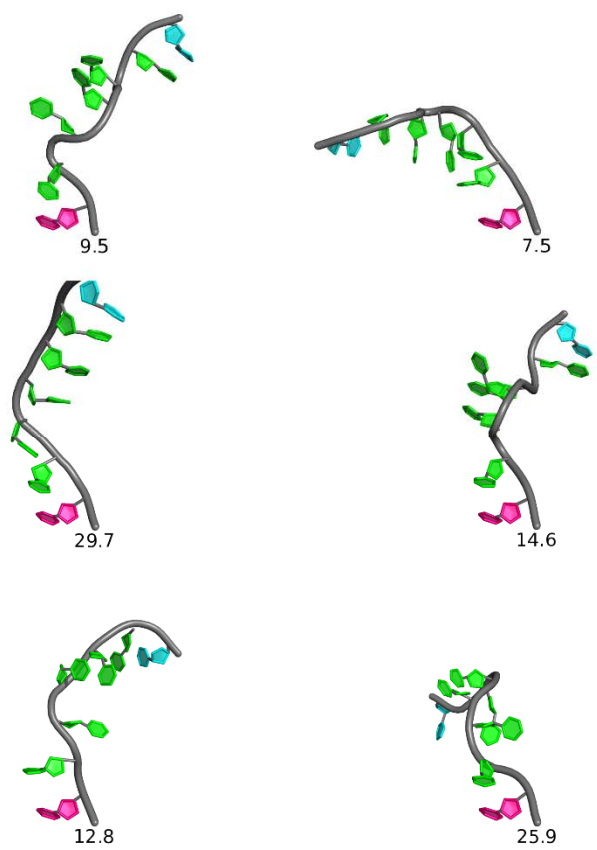

**Figure S9.** The ensemble and junction conformation at  $[KCl] = 500mM$ .
